# Supplementary material for: Where are the paediatricians? An international survey to understand the global paediatric workforce
Source: PubMed Central journal article supplement — BMJ Paediatr Open. 2019 Jan 31;3(1):bmjpo-2018-000397. doi: 10.1136/bmjpo-2018-000397 (PMC6361365; doi:10.1136/bmjpo-2018-000397), 2019-01-31
Supplement: bmjpo-2018-000397.draft_revisions.pdf [file bmjpo-2018-000397.draft_revisions.pdf]

# BMJ Paediatrics Open

BMJ Paediatrics Open is committed to open peer review. As part of this commitment we make the peer review history of every article we publish publicly available.

When an article is published we post the peer reviewers' comments and the authors' responses online. We also post the versions of the paper that were used during peer review. These are the versions that the peer review comments apply to.

The versions of the paper that follow are the versions that were submitted during the peer review process. They are not the versions of record or the final published versions. They should not be cited or distributed as the published version of this manuscript.

BMJ Paediatrics Open is an open access journal and the full, final, typeset and author-corrected version of record of the manuscript is available on our site with no access controls, subscription charges or pay-per-view fees (<http://bmjpaedsopen.bmj.com>).

If you have any questions on BMJ Paediatrics Open's open peer review process please email [info.bmjpo@bmj.com](mailto:info.bmjpo@bmj.com)

# BMJ Paediatrics Open

## Where are the Paediatricians? An International Survey to Understand the Global Paediatric Workforce

|                               |                                                                                                                                                                                                                                                                                                                                                                                |
|-------------------------------|--------------------------------------------------------------------------------------------------------------------------------------------------------------------------------------------------------------------------------------------------------------------------------------------------------------------------------------------------------------------------------|
| Journal:                      | <i>BMJ Paediatrics Open</i>                                                                                                                                                                                                                                                                                                                                                    |
| Manuscript ID                 | bmjpo-2018-000397                                                                                                                                                                                                                                                                                                                                                              |
| Article Type:                 | Original article                                                                                                                                                                                                                                                                                                                                                               |
| Date Submitted by the Author: | 22-Oct-2018                                                                                                                                                                                                                                                                                                                                                                    |
| Complete List of Authors:     | HARPER, BETH; Boston Children's Hospital, Nganga, Waceke; Aga Khan University - Kenya<br>Armstrong, Robert; Aga Khan University - Kenya<br>Forsyth, Kevin; Flinders University Faculty of Medicine Nursing and Health Sciences<br>Ham, Hazen; Global Pediatric Education Consortium<br>Keenan, William; Saint Louis University<br>Russ, Christiana; Children's Hospital Boston |
| Keywords:                     | Paediatric Staffing, Health Service                                                                                                                                                                                                                                                                                                                                            |
|                               |                                                                                                                                                                                                                                                                                                                                                                                |

SCHOLARONE™  
Manuscripts

## Where are the Paediatricians? An International Survey to Understand the Global Paediatric Workforce

Beth D. Harper,<sup>1</sup> Waceke Nganga,<sup>2</sup> Robert Armstrong,<sup>2</sup> Kevin D. Forsyth,<sup>3</sup> Hazen P. Ham,<sup>4</sup> William J. Keenan,<sup>5</sup> Christiana M. Russ<sup>1</sup>

**Affiliations:** <sup>1</sup>Boston Children's Hospital, Boston, USA; <sup>2</sup>Aga Khan University, Nairobi, Kenya; <sup>3</sup>Flinders University, Australia; <sup>4</sup>Global Pediatric Education Consortium, Chapel Hill, USA; <sup>5</sup>Saint Louis University, St. Louis, USA

**Address correspondence to:** Beth D. Harper, Department of Pediatrics, Boston Children's Hospital, 300 Longwood Ave, Boston MA 02115, [beth.harper@childrens.harvard.edu](mailto:beth.harper@childrens.harvard.edu), 617-355-6000

**Funding Source:** This research received no specific grant from any funding agency in the public, commercial or not-for-profit sectors.

**Financial Disclosure:** All authors have no financial relationships relevant to this article to disclose.

**Potential Conflicts of Interest:** The authors have no conflicts of interest relevant to this article to disclose.

### Abbreviations:

Sustainable Development Goals – SDGs

Gross Domestic Product – GDP

Interquartile Range – IQR

International Pediatric Association - IPA

### Contributors' Statement Page

Dr. Harper and Dr. Russ conceptualized and designed the study, designed the data collection instruments, coordinated and supervised data collection, drafted the initial manuscript, and reviewed and revised the manuscript.

Dr. Nganga, Dr. Armstrong, Dr. Forsyth coordinated data collection, reviewed and revised the manuscript.

Dr. Ham assisted with design of the data collection instrument including piloting, and reviewed and revised the manuscript.

Dr. Keenan advised the international approach, aided with data collection, reviewed and revised the manuscript.

1  
2  
3 All authors approved the final manuscript as submitted and agree to be accountable for all  
4 aspects of the work.  
5

## 6 **Abstract**

7  
8  
9  
10 **Objective:** To describe the global paediatric workforce and understand geographic differences  
11 in the work performed by paediatricians.  
12

13 **Design:** Survey of identified paediatric leaders in each country.  
14

15 **Setting:** Paediatric association leaders worldwide  
16

17 **Main outcome measures:** Paediatrician numbers, provision of primary care for children, age of  
18 transition to adult care.  
19

20  
21 **Results:** Responses were obtained from 121 countries (73% of countries approached). The  
22 number of paediatricians per 100,000 children ranged from a median of 1 (IQR 0-1) in low  
23 income countries to 72 (IQR 44-118) in high income countries. Africa and South-East Asia  
24 reported the lowest paediatrician density (median of 1 paediatrician per 100,000 children, IQR 0-3  
25 and median of 4, IQR 3-9, respectively), and fewest paediatricians entering the workforce. 82%  
26 of countries reported transition to adult care by age 18 and 39% by age 15. Most countries  
27 (91%) but only 64% of low income countries reported provision of paediatric preventative care  
28 ( $p < 0.001$ ). Systems of primary care provision varied widely. A majority of countries (63%)  
29 anticipated increases in their paediatric workforce in the next decade.  
30  
31  
32

33  
34 **Conclusions:** Paediatrician density mirrors known inequities in health provider distribution.  
35 Fewer paediatricians are entering the workforce in areas with already low paediatrician density,  
36 which may exacerbate disparities in child health outcomes. In some regions, children transition  
37 to adult care during adolescence, with implications for health care training and delivery.  
38 Paediatrician roles are heterogeneous worldwide, and country-specific strategies should be  
39 utilized to address inequity in child health provision.  
40  
41  
42  
43  
44  
45  
46  
47  
48  
49  
50  
51  
52  
53  
54  
55  
56  
57  
58  
59  
60

**What is Known about This Subject:**

Significant discrepancy between burden of disease and distribution of health professionals has been documented.

Various structures are in place for paediatric care across the globe.

The global distribution of pediatricians, their role in providing care to children and the structure for child health systems in various countries are not known.

**What This Study Adds:**

There are inequities in both paediatrician distribution and numbers of new paediatricians entering the workforce in areas with high child mortality.

Most countries provide some regular primary care for children, but the systems to provide that care are highly variable.

In many areas, children transition from paediatric care in early adolescence, with implications for training and care delivery.

## Introduction

The discrepancy between the global burden of disease and the distribution of health professionals has been well-described.(1-9) Areas with the highest disease burden have the lowest percentage of health professionals, exacerbating the impact of the health workforce deficit. The World Health Organization has identified an index of 4.45 health workers (physicians, nurses, and midwives) per 1000 population necessary to meet the sustainable development goals (SDGs) by 2030.(6) Countries are called on to set specific targets for numbers of health workers including physicians and health specialists depending upon their needs and health services structure.

Child health was a focal point in the millennium development goals and continues to be important in the SDGs. Epidemiologic shifts towards non-communicable diseases, a renewed focus on optimizing child development, the unique health needs of adolescents, and emphasis on reducing morbidity not just mortality, all require renewed deliberation about how health care for children is delivered and advanced.(10-12) Differing health system designs lead to wide variability in the roles that paediatricians and other child health providers fill in supporting the health of a country's children. Understanding those roles is vital to providing equitable and quality health care and to developing appropriate training competencies for all child health professionals.

Some regional efforts have been undertaken to understand where paediatricians are working and what roles they play, but the paediatric workforce worldwide has not been previously described.(6, 13-15) Similarly, while health systems have been described on country and sometimes regional levels, a global understanding of health care systems for children and their variation can provide valuable information for potential reforms at country level.

1  
2  
3 The goal of this study was to examine the global status of the paediatric workforce and to  
4 better understand geographic differences in the types of work that paediatricians undertake in the  
5 provision of child health care. Our objectives were to identify the number of paediatricians  
6 globally, examine paediatric workforce expectations, understand who provides children with  
7 regular promotive and preventative care, and to learn when children transition out of paediatric  
8 care to adult care.  
9  
10  
11  
12  
13  
14  
15  
16  
17  
18

## 19 **Methods**

### 20 *Survey development*

21  
22  
23  
24  
25 An online survey was developed using REDCap, an electronic survey tool.(16) The  
26 survey queried the number of paediatricians per country, expected workforce changes, primary  
27 care provision for children, and age of transition to adult care. Faculty at Boston Children's  
28 Hospital initially piloted the survey with cognitive interviewing to improve question clarity. The  
29 refined survey was further piloted and edited with paediatric leaders within the Global Paediatric  
30 Education Consortium representing Europe, Asia, Africa, and the Middle East.(17) As the  
31 internationally agreed upon languages for communication between paediatric societies in the  
32 International Paediatric Association (IPA) are English, French and Spanish, the final survey was  
33 translated into French and Spanish by DR Interpreting, Inc. Translated surveys were sent to  
34 native French and Spanish speakers to confirm accuracy of the translation.  
35  
36  
37  
38  
39  
40  
41  
42  
43  
44  
45  
46  
47  
48

### 49 *Study Sample*

50  
51  
52 The survey was distributed to identified paediatric leaders with a goal of attaining one  
53 response per country or economy. Countries and economies for inclusion were defined as the  
54  
55  
56  
57  
58  
59  
60

1  
2  
3 193 UN member countries plus the 5 World Bank Economies (Hong Kong, Macau, Palestine,  
4 Puerto Rico and Taiwan) with populations of over 500,000 people, for a total of 198 countries  
5 and economies. The survey was initially distributed in May 2015 via email to the lead delegates  
6 from the 121 countries with active membership in the IPA at that time. Regional and  
7 subspecialty societies that did not function at the country level were excluded. The survey was  
8 sent to non-respondents each week for three consecutive weeks. In a second phase, contact was  
9 made with paediatric leaders within the non-responding countries, as well as an additional 45  
10 countries in which paediatric leadership was identified through contacts known to the author  
11 group, networks from the Global Paediatric Education Consortium, International Paediatric  
12 Academic Leaders Association, Harvard University, the American Academy of Paediatrics  
13 Section of International Child Health, or through contacts with country Ministries of Health.  
14 Paediatric leaders from non-responding countries who were in attendance at the International  
15 Paediatric Congress in August 2016 were also identified and approached.

16  
17  
18  
19  
20  
21  
22  
23  
24  
25  
26  
27  
28  
29  
30  
31  
32  
33  
34 A majority of countries (73) had a single response. Of those countries with duplicate  
35 responses to the survey, 30 had only one complete response and 17 required further review by  
36 the authors (BH and CR). Of those, seven countries had identical duplicate responses, or the  
37 response that was most complete was selected. Ten countries were contacted to clarify duplicate  
38 responses, and 9 clarified. One country had two responses with some variation, and the  
39 respondents could not be reached for clarification; for that country the response from the  
40 president of the country's paediatric association was used.

41  
42  
43  
44  
45  
46  
47  
48  
49  
50  
51 Country statistics for populations under age 18 were obtained from publically available  
52 UNICEF country statistics.(18) Income and GDP classifications were based on 2016 World  
53 Bank groupings.



### Statistical Analysis

Paediatric workforce characteristics were described using frequencies, medians and interquartile ranges where appropriate. Comparisons between regions were calculated using Kruskal-Wallis tests and Fisher's exact tests, while comparisons between GDP categories were calculated using non-parametric tests for trend and Cochran-Armitage trend tests. Data was analyzed using Stata (StataCorp. 2015. *Stata Statistical Software: Release 14*. College Station, TX: StataCorp LP).

The study protocol was reviewed by the Institutional Review Board at Boston Children's Hospital and deemed not human subjects research.

### Results

Responses were received from 95 (79%) of the 121 countries with IPA membership, and 121 (73%) of the 166 total countries and economies for which a contact was identified. In total, this represented 61% of the global 198 countries and economies. Eight countries responded in French, ten in Spanish, and the remainder in English.

There were 32 countries for whom no contact was identified and therefore no survey sent, and 45 countries that did not respond to the survey (Table 1). No contact identified and non-responder countries did not vary significantly from responder countries by GDP ( $p=0.18$ ), but did vary by region ( $p=0.002$ ). Countries with no contact identified had significantly smaller populations than those targeted, with a median population of 274,000 ( $p<0.001$ ).

The number of paediatricians reported was normalized against the population of children under 18 years old in each country to obtain a paediatrician density ratio (Figure 1).

1  
2  
3 Paediatrician density varied significantly by GDP, ranging from a median of 1 paediatrician per  
4 100,000 children in low income countries to a median of 72 paediatricians per 100,000 children  
5  
6 in high income countries ( $p < 0.001$ , Table 2). In addition, significant variability was seen by  
7  
8 region ( $p < 0.001$ , Table 3). The lowest density was seen in Africa (median of 1 paediatrician per  
9  
10 100,000 children, interquartile range (IQR) 0-3) and South-East Asia (median of 4 paediatricians  
11  
12 per 100,000 children, IQR 3-9) as compared with a global median of 30 paediatricians per  
13  
14 100,000 children (IQR 5-70) and 59 and 87 per 100,000 children (IQR 40-110, and 50-140) in  
15  
16 North America and Europe, respectively.  
17  
18  
19  
20  
21

22 The number of new paediatricians entering the workforce also varied by GDP  
23  
24 classification ( $p = 0.01$ ) and by region ( $p < 0.001$ ). In low income countries, the paediatric  
25  
26 workforce gained a median of 10 new paediatricians per year, or 0.08 per 100,000 children,  
27  
28 while in high income countries the median was 60 new paediatricians per year, or 3 per 100,000  
29  
30 children (Table 2). In Africa, countries anticipated a median of 5 new paediatricians (0.08 per  
31  
32 100,000 children) per year as compared to a global median of 30 (1.44 paediatricians per  
33  
34 100,000 children) (Table 3).  
35  
36  
37  
38

39 Age of transition out of paediatric care did not vary by gross domestic product (GDP,  
40  
41 Table 2) but did vary by region ( $p < 0.001$ , Table 3). Notably, in South-East Asia, Africa, and the  
42  
43 Eastern Mediterranean, over 65% of countries reported that children transitioned from paediatric  
44  
45 care by age 15 years, whereas less than 45% of countries reported transition by age 15 in South  
46  
47 and Central America and less than 15% in Europe, North America, and the Western Pacific.  
48  
49  
50

51 Most countries (91%) responded affirmatively when asked “*do children in your country*  
52  
53 *receive regular preventative and promotive care throughout childhood (well-child checks,*  
54  
55  
56  
57  
58  
59  
60

1  
2  
3 *growth monitoring, nutrition assessment, parenting advice, anticipatory guidance,*  
4  
5 *immunization) by either a physician or non-physician health care provider?"* This rate was  
6  
7 considerably lower in low-income countries, where only 64% of countries reported regular  
8  
9 primary care ( $p < 0.001$ , Table 2). The type of provider seen for primary paediatric care varied  
10  
11 (Figure 2). Worldwide, children see non-physicians as the primary care provider a median of  
12  
13 28% of the time (Table 2, Table 3, IQR 9-59%). If children saw a physician, that person was a  
14  
15 paediatrician (rather than general physician, family physician or medical officer) a median of  
16  
17 33% of the time.  
18  
19  
20  
21

## 22 **Discussion**

23  
24  
25 This international survey of paediatricians is the first, to our knowledge, to report data on  
26  
27 paediatrician density and the roles that paediatricians play in provision of care for children on a  
28  
29 global scale. This study identified wide variability in paediatrician density, consistent with health  
30  
31 workforce findings of physicians as a whole.(5, 8, 19) Areas with the highest burden of  
32  
33 paediatric mortality and morbidity had the lowest paediatrician density, and paediatricians are  
34  
35 joining the workforce at lower rates in those same regions. One reason for this inequity may be  
36  
37 the existence of a training capacity gap, with fewer avenues to train paediatricians or fewer  
38  
39 opportunities for employment in areas with an already low workforce. Some high-income  
40  
41 countries have already undertaken more detailed analysis of their paediatric workforce, and used  
42  
43 this to inform investment and education policy.(14, 20-24)  
44  
45  
46  
47  
48

49 Another explanation could be the impact of internal or external migration on access to  
50  
51 paediatric care. Both have multiple drivers, including job satisfaction, healthy work  
52  
53 environment, adequate supplies, feeling of support, and appropriate recognition.(2, 25, 26)  
54  
55  
56  
57  
58  
59  
60

1  
2  
3 Within countries, there is often a significant misdistribution of health care professionals towards  
4 large, wealthy urban areas.(1, 2, 25, 27) More detailed data on intra-national distribution of  
5 paediatricians would be valuable in understanding and seeking to address these disparities of  
6 access. Migration between countries has also been well documented.(1, 2, 8, 26) While there are  
7 no clear data on the impact of this ‘brain drain’ in paediatrics, in both the United States and UK,  
8 it is estimated that one-third of the paediatrician workforce are international medical  
9 graduates.(28, 29) Efforts to improve salaries, work environments and career opportunities may  
10 be effective means of decreasing external migration.(30-32)

11  
12 This study identified that many children transition from paediatric care to adult care by  
13 age 15, relatively early in adolescence. Age of transition varied by region but not by country  
14 income, suggesting that it may be more associated with cultural or professional norms around  
15 transition to adulthood rather than workforce planning. Improved understanding of the systems  
16 of care for adolescents is critical among UN, WHO and Lancet Commission calls for increased  
17 focus, expertise and research on adolescent-specific care.(10-12) With early transition to adult  
18 care, advancing the adolescent health agenda may require a defined framework for adolescent  
19 services and multisectoral approach that engages youth within their communities.

20  
21 Our study demonstrated that while most countries offered some form of broadly defined  
22 preventive care to children, this primary care role is often filled by non-physicians or generalists.  
23 In both high and low income countries, task shifting and task sharing have been important and  
24 often successful methods for improving access to care and addressing health costs while  
25 retaining quality of care.(33-37) Most countries continue to explore the appropriate skills mix for  
26 providing care, particularly in community settings. Optimizing this skills mix will require inter-  
27 professional collaboration and training to promote successful multidisciplinary primary care.

1  
2  
3 System planning needs to account for and support the primary role of family and the informal  
4 care structures that may exist in communities. A thoughtful country-level approach is required to  
5  
6 balance development of preventive and community interventions, alongside secondary and  
7  
8 tertiary level services with appropriate referral structures.  
9  
10

11  
12  
13 Workforce studies, including this one, may not capture all of the specific roles that health  
14 professionals play, including leadership in health care systems, policy, and government;  
15  
16 educators and researchers in universities; and community advocates. A robust national workforce  
17  
18 strategy needs to account for these roles, and country-level human resources for health planning  
19  
20 should establish a target density for the paediatrician workforce in relation to their expected roles  
21  
22 within the system. Designation of tasks such as provision of primary care and age of transition  
23  
24 to adult care would need to be considered in order to appropriately define paediatric workforce  
25  
26 requirements. Analysis of skills mix needs should also incorporate anticipated epidemiologic  
27  
28 changes including a reduction in infectious causes of under-5 mortality, an increase in the  
29  
30 proportion of neonatal mortality, and a shift towards chronic diseases in children.(12, 38) As  
31  
32 countries work to scale-up their health care workforce these baseline data can help inform  
33  
34 development strategies.(39, 40)  
35  
36  
37  
38  
39  
40  
41

42 This study has several limitations. We found no validated tool that would appropriately  
43  
44 meet our study objective, therefore developed the survey de novo. Despite piloting the survey  
45  
46 among multiple countries, cultures, and languages, it is possible that some terms, while  
47  
48 commonly used, may have been interpreted differently in different settings, particularly among  
49  
50 respondents for whom French, English or Spanish was not their native language. All data were  
51  
52 collected as survey responses, usually from a single representative in each country. While we  
53  
54 targeted experts at the national paediatric association level who would have knowledge of the  
55  
56  
57  
58  
59  
60

1  
2  
3 state of paediatrics and child health in that nation, responses could vary among individuals  
4 particularly for more subjective questions. While we achieved a high level of response globally,  
5 there were regional gaps, with particular low responses from West Africa and the Western  
6 Pacific. Countries with low physician density and population were similarly underrepresented in  
7 this sample. These challenges may have been due to language or internet access difficulties,  
8 absence of or less active national paediatric organization or simply limited paediatric presence in  
9 those countries. This study was focused on paediatricians, a small component in any country of  
10 the human workforce related to child health and health systems. However, paediatricians are  
11 important resources for countries, with substantial understanding of child health needs who can  
12 also help support country development of child health services and provide guidance for the  
13 continuum of care for children and families.  
14  
15  
16  
17  
18  
19  
20  
21  
22  
23  
24  
25  
26  
27  
28

## 29 **Conclusion**

30  
31  
32 As the global community seeks universal health coverage and works to address the  
33 known shortage in healthcare workers, care should be taken to meet the health workforce needs  
34 of the world's children and adolescents. Clarification of paediatrician roles and accompanying  
35 skill mix is important in developing health workforce capacity to meet those needs. This study  
36 described the state of the paediatric workforce worldwide with notable variability in  
37 paediatrician density and roles in different countries. A training capacity gap in countries with  
38 high disease burdens may exacerbate the problem of a small workforce relative to healthcare  
39 needs. These findings highlight the need for country specific child health workforce strategies,  
40 assisted by the development of standardized tools to monitor health care capacity and outcomes  
41 as countries focus on meeting the SDGs for child health.  
42  
43  
44  
45  
46  
47  
48  
49  
50  
51  
52  
53  
54  
55  
56  
57  
58  
59  
60

1  
2  
3  
4  
5  
6  
7  
8  
9  
10  
11  
12  
13  
14  
15  
16  
17  
18  
19  
20  
21  
22  
23  
24  
25  
26  
27  
28  
29  
30  
31  
32  
33  
34  
35  
36  
37  
38  
39  
40  
41  
42  
43  
44  
45  
46  
47  
48  
49  
50  
51  
52  
53  
54  
55  
56  
57  
58  
59  
60

Confidential: For Review Only

### Acknowledgements

The authors wish to thank Edgar Vesga for his assistance with survey implementation, members of the Global Pediatric Education Consortium who piloted the survey, Julie Hurlbut for assistance with data analysis, tables and figures, Lisa Asaro and David Wypij for assistance with statistical analysis, and Judith Palfrey for editing.

Confidential: For Review Only



## References

1. Chen C, Buch E, Wassermann T, et al. A survey of Sub-Saharan African medical schools. *Hum Resour Health*. 2012;10:4.
2. Kasper J, Bajunirwe F. Brain drain in sub-Saharan Africa: contributing factors, potential remedies and the role of academic medical centres. *Archives of disease in childhood*. 2012;97(11):973-9.
3. Liu JX, Goryakin Y, Maeda A, et al. Global Health Workforce Labor Market Projections for 2030. *Hum Resour Health*. 2017;15(1):11.
4. Baker T. Pediatric emergency and critical care in low-income countries. *Paediatric anaesthesia*. 2009;19(1):23-7.
5. Shehu BB, Ameh EA. Poverty and disease burden vs medical education in sub-Saharan Africa. *Annals of African medicine*. 2007;6(4):139-41.
6. WHO. Health workforce Requirements for Universal health coverage and the sustainable development goals. *Human Resources for Health Observer Series* 2016;17.
7. Pozo-Martin F, Nove A, Lopes SC, et al. Health workforce metrics pre- and post-2015: a stimulus to public policy and planning. *Hum Resour Health*. 2017;15(1):14.
8. Crisp N, Chen L. Global supply of health professionals. *The New England journal of medicine*. 2014;370(10):950-7.
9. Frenk J, Chen L, Bhutta ZA, et al. Health professionals for a new century: transforming education to strengthen health systems in an interdependent world. *Lancet* (London, England). 2010;376(9756):1923-58.
10. Patton GC, Sawyer SM, Santelli JS, et al. Our future: a Lancet commission on adolescent health and wellbeing. *Lancet* (London, England). 2016;387(10036):2423-78.
11. Every Woman Every Child: The Global Strategy for Women's, Children's and Adolescents' Health (2016-2030). 2016.
12. Kyu HH, Pinho C, Wagner JA, et al. Global and National Burden of Diseases and Injuries Among Children and Adolescents Between 1990 and 2013: Findings From the Global Burden of Disease 2013 Study. *JAMA pediatrics*. 2016;170(3):267-87.
13. van Esso D, del Torso S, Hadjipanayis A, et al. Paediatric primary care in Europe: variation between countries. *Archives of disease in childhood*. 2010;95(10):791-5.
14. Woodhead M. China to train 22,000 more paediatricians in next four years. *BMJ (Clinical research ed)*. 2016;352:i1376.
15. Ehrich JH, Tenore A, del Torso S, et al. Diversity of Pediatric Workforce and Education in 2012 in Europe: A Need for Unifying Concepts or Accepting Enjoyable Differences? *The Journal of pediatrics*. 2015;167(2):471-6.e4.
16. Harris PA, Taylor R, Thielke R, et al. Research electronic data capture (REDCap)--a metadata-driven methodology and workflow process for providing translational research informatics support. *Journal of biomedical informatics*. 2009;42(2):377-81.
17. Global Pediatric Education Consortium. [Available from: <http://www.globalpediatrics.org/>. [Accessed August 2018].
18. UNICEF. Country Statistics. [https://www.unicef.org/statistics/index\\_countrystats.html](https://www.unicef.org/statistics/index_countrystats.html). [Accessed August 2018].
19. WHO. Global strategy on human resources for health: workforce 2030. 2016.
20. Ranson MK, Chopra M, Atkins S, et al. Priorities for research into human resources for health in low- and middle-income countries. *Bulletin of the World Health Organization*. 2010;88(6):435-43.
21. McColgan M, Winch R, Clark SJ, et al. The changing UK paediatric consultant workforce: report from the Royal College of Paediatrics and Child Health. *Archives of disease in childhood*. 2017;102(2):170-3.

22. Freed GL, Moran LM, Van KD, et al. Current Workforce of General Pediatricians in the United States. *Pediatrics*. 2016;137(4).
23. Mullan F, Frehywot S. Non-physician clinicians in 47 sub-Saharan African countries. *Lancet* (London, England). 2007;370(9605):2158-63.
24. Hu KJ, Sun ZZ, Rui YJ, et al. Shortage of paediatricians in China. *Lancet* (London, England). 2014;383(9921):954.
25. Leu HI, Chang WT, Lin MH, et al. Urban-Rural Disparity in Geographical and Temporal Availability of Pediatric Clinics: A Nationwide Survey in Taiwan. *Pediatrics and neonatology*. 2016.
26. Bundred P, Gibbs T. Medical migration and Africa: an unwanted legacy of educational change. *Medical teacher*. 2007;29(9):893-6.
27. Shipman SA, Lan J, Chang CH, et al. Geographic maldistribution of primary care for children. *Pediatrics*. 2011;127(1):19-27.
28. Pediatrician workforce statement. *Pediatrics*. 2005;116(1):263-9.
29. RCPCH. RCPCH Medical Workforce Census 2013. 2014.
30. Aluttis C, Bishaw T, Frank MW. The workforce for health in a globalized context--global shortages and international migration. *Global health action*. 2014;7:23611.
31. Taylor AL, Hwenda L, Larsen BI, et al. Stemming the brain drain--a WHO global code of practice on international recruitment of health personnel. *The New England journal of medicine*. 2011;365(25):2348-51.
32. Dayrit M, Taylor A, Yan J, et al. WHO code of practice on the international recruitment of health personnel. *Bulletin of the World Health Organization*. 2008;86(10):739.
33. Penazzato M, Davies MA, Apollo T, et al. Task shifting for the delivery of pediatric antiretroviral treatment: a systematic review. *Journal of acquired immune deficiency syndromes (1999)*. 2014;65(4):414-22.
34. Sanne I, Orrell C, Fox MP, et al. Nurse versus doctor management of HIV-infected patients receiving antiretroviral therapy (CIPRA-SA): a randomised non-inferiority trial. *Lancet* (London, England). 2010;376(9734):33-40.
35. Lynch S, Ford N, van Cutsem G, et al. Public health. Getting HIV treatment to the most people. *Science* (New York, NY). 2012;337(6092):298-300.
36. WHO. Treat, Train, Retain. The AIDS and health workforce plan. 2006.
37. Fulton BD, Scheffler RM, Sparkes SP, et al. Health workforce skill mix and task shifting in low income countries: a review of recent evidence. *Hum Resour Health*. 2011;9:1.
38. Kanyuka M, Ndawala J, Mleme T, et al. Malawi and Millennium Development Goal 4: a Countdown to 2015 country case study. *The Lancet Global health*. 2016;4(3):e201-14.
39. Mullan F, Frehywot S, Omaswa F, et al. Medical schools in sub-Saharan Africa. *Lancet* (London, England). 2011;377(9771):1113-21.
40. Haley CA, Vermund SH, Moyo P, et al. Impact of a critical health workforce shortage on child health in Zimbabwe: a country case study on progress in child survival, 2000-2013. *Health policy and planning*. 2017.

**Table 1: Characteristics of responder, non-responder, and no contact identified groups**

|                                                                        | Responder             | Non-responder        | No contact identified | <i>P</i> value* |
|------------------------------------------------------------------------|-----------------------|----------------------|-----------------------|-----------------|
| Countries, no. (%)                                                     | 121 (61)              | 45 (23)              | 32 (16)               |                 |
| GDP classification <sup>1</sup>                                        |                       |                      |                       | 0.18            |
| Low income, no. (%)                                                    | 14 (12)               | 12 (27)              | 5 (16)                |                 |
| Lower middle income, no. (%)                                           | 30 (25)               | 12 (27)              | 8 (25)                |                 |
| Upper middle income, no. (%)                                           | 34 (28)               | 12 (27)              | 12 (38)               |                 |
| High income, no. (%)                                                   | 43 (36)               | 9 (20)               | 7 (22)                |                 |
| Region <sup>2</sup>                                                    |                       |                      |                       | 0.002           |
| Africa, no. (%)                                                        | 23 (19)               | 17 (38)              | 6 (19)                |                 |
| South-East Asia, no. (%)                                               | 8 (7)                 | 1 (2)                | 1 (3)                 |                 |
| South and Central America, no. (%)                                     | 19 (16)               | 8 (18)               | 5 (16)                |                 |
| Western Pacific, no. (%)                                               | 12 (10)               | 4 (9)                | 13 (41)               |                 |
| Eastern Mediterranean, no. (%)                                         | 15 (12)               | 6 (13)               | 1 (3)                 |                 |
| North America, no. (%)                                                 | 3 (2)                 | 1 (2)                | 0                     |                 |
| Europe, no. (%)                                                        | 41 (34)               | 8 (18)               | 6 (19)                |                 |
| Country population, <sup>3</sup> median in thousands (IQR)             | 10,824 (4,503-43,417) | 7,237 (2,175-17,468) | 274 (98-1,208)        | <0.001          |
| Country population <18 years, <sup>4</sup> median in thousands (IQR)   | 3,744 (1,081-14,144)  | 3,248 (798-9,500)    | 113 (27-581)          | 0.08            |
| Number of physicians per 100,000 population, <sup>6</sup> median (IQR) | 158 (43-290)          | 62 (8-241)           | 46 (19-147)           | 0.002           |

<sup>1</sup> World Bank list of economies (2017) [Internet]. World Bank. Available from: <http://databank.worldbank.org/data/download/site-content/CLASS.xls>

<sup>2</sup> Region classification based on "WHO regional offices." World Health Organization, World Health Organization, 2017, [www.who.int/about/regions/en/](http://www.who.int/about/regions/en/).

<sup>3</sup> Population, total. (2017, September 18). Retrieved October 09, 2017, from <https://data.worldbank.org/indicator/SP.POP.TOTL>

<sup>4</sup> The State of the World's Children 2016 Statistical Tables. (2016, June 27). Retrieved October 31, 2017, from <https://data.unicef.org/resources/state-worlds-children-2016-statistical-tables/>

<sup>6</sup> The 2016 update, Global Health Workforce Statistics, World Health Organization, Geneva (<http://www.who.int/hrh/statistics/hwfstats/>).

\* *P* values for the comparison between type of contact categories were calculated using Fisher's exact tests for categorical variables and Kruskal-Wallis tests for continuous variables.

**Table 2: Results by GDP Classification**

|                                                                                                                                    | <b>World<br/>(N=121)</b> | <b>Low Income<br/>(N=14)</b> | <b>Lower Middle<br/>Income (N=30)</b> | <b>Upper Middle<br/>Income (N=34)</b> | <b>High Income<br/>(N=43)</b> | <b><i>P</i> value*</b> |
|------------------------------------------------------------------------------------------------------------------------------------|--------------------------|------------------------------|---------------------------------------|---------------------------------------|-------------------------------|------------------------|
| Number of pediatricians per country, median (IQR)                                                                                  | 675 (170-3,600)          | 70 (25-200)                  | 625 (320-5,000)                       | 1,700 (256-6,000)                     | 1,400 (500-3,500)             | <0.001                 |
| Number of pediatricians per 100,000 children <18 years <sup>1</sup> , median (IQR)                                                 | 32 (5-74)                | 1 (0-1)                      | 6 (3-32)                              | 30 (15-60)                            | 72 (44-118)                   | <0.001                 |
| Number of new pediatricians entering the workforce each year per 100,000 children <18 years in country <sup>1</sup> , median (IQR) | 1.45 (0.42-3.07)         | 0.08 (0.03-0.18)             | 0.42 (0.18-1.06)                      | 1.36 (0.57-2.09)                      | 3.10 (2.05-4.06)              | 0.01                   |
| Number of countries reporting Transition from pediatric care <sup>†</sup>                                                          |                          |                              |                                       |                                       |                               |                        |
| by age 12 years, no. (%)                                                                                                           | 3 (3)                    | 0                            | 3 (10)                                | 0                                     | 0                             | 0.13                   |
| by age 15 years, no. (%)                                                                                                           | 47 (39)                  | 9 (64)                       | 15 (50)                               | 13 (39)                               | 10 (23)                       | 0.002                  |
| by age 18 years, no. (%)                                                                                                           | 98 (82)                  | 14 (100)                     | 27 (90)                               | 26 (79)                               | 31 (72)                       | 0.01                   |
| by age 21 years, no. (%)                                                                                                           | 118 (98)                 | 14 (100)                     | 30 (100)                              | 33 (100)                              | 41 (95)                       | 0.18                   |
| Countries reporting regular pediatric promotive and preventive care received, no. (%)                                              | 110 (91)                 | 9 (64)                       | 26 (87)                               | 33 (97)                               | 42 (98)                       | <0.001                 |
| Percentage of primary care provided by non-physician, median (IQR)                                                                 | 28 (9-59)                | 82 (70-85)                   | 35 (10-68)                            | 28.5 (2-51)                           | 24 (9-45)                     | 0.01                   |
| Percentage of primary care provided by general physician, family doctor, or medical officer, median (IQR)                          | 21 (11-36)               | 12 (7-16)                    | 24 (14-42)                            | 18 (10-27)                            | 23 (10-36)                    | 0.76                   |
| Percentage of primary care provided by pediatrician, median (IQR)                                                                  | 33 (13-57)               | 17 (8-22)                    | 27 (12-46)                            | 44 (23-56)                            | 46 (7-73)                     | 0.04                   |
| Number of physicians per 100,000 population, <sup>2</sup> median (IQR)                                                             | 125 (21-269)             | 6 (3-12)                     | 43 (18-142)                           | 149 (67-229)                          | 283 (195-369)                 | <0.001                 |

<sup>1</sup> The State of the World's Children 2016 Statistical Tables. (2016, June 27). Retrieved October 31, 2017, from <https://data.unicef.org/resources/state-worlds-children-2016-statistical-tables/>

<sup>2</sup> The 2016 update, Global Health Workforce Statistics, World Health Organization, Geneva (<http://www.who.int/hrh/statistics/hwfstats/>).

\**P* values for the comparison between GDP classifications were calculated using nonparametric tests for trend for continuous variables and Cochran-Armitage trend tests for categorical variables.

<sup>†</sup> Age of transition from pediatric care not reported by one country in the upper middle income group.

**Table 3: Results by Region**

|                                                                                                                                         | World<br>(N=121)        | Africa<br>(N=23)        | South-East<br>Asia (N=8) | South and<br>Central<br>America<br>(N=19) | Western<br>Pacific<br>(N=12) | Eastern<br>Mediterranean<br>(N=15) | North<br>America<br>(N=3) | Europe<br>(N=41)     | <i>P</i><br>value* |
|-----------------------------------------------------------------------------------------------------------------------------------------|-------------------------|-------------------------|--------------------------|-------------------------------------------|------------------------------|------------------------------------|---------------------------|----------------------|--------------------|
| GDP classification <sup>1</sup>                                                                                                         |                         |                         |                          |                                           |                              |                                    |                           |                      | <0.001             |
| Low income, no. (%)                                                                                                                     | 14 (12)                 | 11 (48)                 | 1 (13)                   | 1 (5)                                     | 0                            | 1 (7)                              | 0                         | 0                    |                    |
| Lower middle income, no. (%)                                                                                                            | 30 (25)                 | 6 (26)                  | 6 (75)                   | 4 (21)                                    | 5 (42)                       | 5 (33)                             | 0                         | 4 (10)               |                    |
| Upper middle income, no. (%)                                                                                                            | 34 (28)                 | 5 (22)                  | 1 (13)                   | 12 (63)                                   | 1 (8)                        | 4 (27)                             | 1 (33)                    | 10 (24)              |                    |
| High income, no. (%)                                                                                                                    | 43 (36)                 | 1 (4)                   | 0                        | 2 (11)                                    | 6 (50)                       | 5 (33)                             | 2 (67)                    | 27 (66)              |                    |
| Number of pediatricians per country,<br>median (IQR)                                                                                    | 650<br>(180-<br>3,500)  | 70<br>(22.5-167)        | 500<br>(320-3,700)       | 1,200<br>(30-5,500)                       | 2,900<br>(600-5,600)         | 650<br>(425-3000)                  | 25,000<br>(2,667-80,000)  | 1,545<br>(500-4,500) | <0.001             |
| Number of pediatricians per 100,000<br>children <18 years, <sup>2</sup> median (IQR)                                                    | 30 (5-70)               | 1 (0-3)                 | 4 (3-9)                  | 47 (10-60)                                | 32 (20-60)                   | 30 (10-50)                         | 59 (40-110)               | 87 (50-140)          | <0.001             |
| Number of new pediatricians entering the<br>workforce each year per 100,000 children<br><18 years in country, <sup>2</sup> median (IQR) | 1.44<br>(0.42-<br>3.07) | 0.08<br>(0.04-<br>0.14) | 0.42<br>(0.35-0.79)      | 1.47<br>(1.05-2.67)                       | 1.44<br>(0.60-3.06)          | 0.80<br>(0.37-2.19)                | 5.61<br>(1.66-9.57)       | 3.08<br>(1.86-4.05)  | <0.001             |
| Transition from pediatric care <sup>†</sup>                                                                                             |                         |                         |                          |                                           |                              |                                    |                           |                      |                    |
| by age 12 years, no. (%)                                                                                                                | 3 (3)                   | 1 (4)                   | 0                        | 2 (11)                                    | 0                            | 0                                  | 0                         | 0                    | 0.25               |
| by age 15 years, no. (%)                                                                                                                | 47 (39)                 | 16 (70)                 | 6 (75)                   | 8 (44)                                    | 1 (8)                        | 11 (73)                            | 0                         | 5 (12)               | <0.001             |
| by age 18 years, no. (%)                                                                                                                | 98 (82)                 | 23 (100)                | 7 (88)                   | 15 (83)                                   | 8 (67)                       | 15 (100)                           | 2 (67)                    | 29 (71)              | <0.001             |
| by age 21 years, no. (%)                                                                                                                | 118 (98)                | 23 (100)                | 8 (100)                  | 18 (100)                                  | 11 (92)                      | 15 (100)                           | 2 (67)                    | 41 (100)             | 0.01               |
| Countries reporting regular pediatric<br>promotive and preventive care received,<br>no. (%)                                             | 110 (91)                | 19 (83)                 | 7 (88)                   | 19 (100)                                  | 11 (92)                      | 10 (67)                            | 3 (100)                   | 41 (100)             | 0.002              |
| Percentage of primary care provided by<br>non-physician, median (IQR)                                                                   | 28 (9-58)               | 81 (53-85)              | 50 (35-68)               | 32 (17-61)                                | 11 (5-27)                    | 18.5 (17-26)                       | 30 (12-32)                | 13 (3-33)            | <0.001             |
| Percentage of primary care provided by<br>general physician, family doctor, or<br>medical officer, median (IQR)                         | 19.8<br>(11-56)         | 17<br>(12-25)           | 17<br>(10.9-38)          | 18<br>(12-28)                             | 36<br>(15-46)                | 20.8<br>(14-24)                    | 17<br>(17-17)             | 22<br>(9-49)         | 0.83               |
| Percentage of primary care provided by<br>pediatrician, median (IQR)                                                                    | 33<br>(13-59)           | 3<br>(2-16)             | 27<br>(20-33)            | 26<br>(23-55)                             | 50<br>(46-71)                | 59<br>(47-69)                      | 51<br>(51-51)             | 48<br>(26-73)        | <0.001             |
| Number of physicians per 100,000<br>population, <sup>3</sup> (median, IQR)                                                              | 125<br>(21-269)         | 10<br>(5-20)            | 39<br>(21-73)            | 113<br>(62-178)                           | 122<br>(44-191)              | 149<br>(62-196)                    | 252<br>(227-263)          | 329<br>(269-393)     | <0.001             |

<sup>1</sup> World Bank list of economies (2017) [Internet]. World Bank. Available from: <http://databank.worldbank.org/data/download/site-content/CLASS.xls>

<sup>2</sup> The State of the World's Children 2016 Statistical Tables. (2016, June 27). Retrieved October 31, 2017, from <https://data.unicef.org/resources/state-worlds-children-2016-statistical-tables/>

<sup>3</sup> The 2016 update, Global Health Workforce Statistics, World Health Organization, Geneva (<http://www.who.int/frh/statistics/hwfstats/>).

\* *P* values for the comparison between regions were calculated using Fisher's exact tests for categorical variables and Kruskal-Wallis tests for continuous variables.

† Age of transition from pediatric care not reported by one country in the South and Central America region.

Confidential: For Review Only

1  
2  
3  
4  
5  
6  
7  
8  
9  
10  
11  
12  
13  
14  
15  
16  
17  
18  
19  
20  
21  
22  
23  
24  
25  
26  
27  
28  
29  
30  
31  
32  
33  
34  
35  
36  
37  
38  
39  
40  
41  
42  
43  
44  
45  
46  
47  
48  
49  
50  
51  
52  
53  
54  
55  
56  
57  
58  
59  
60

**Figure 1: Pediatrician density per 100,000 children <18 years old\***

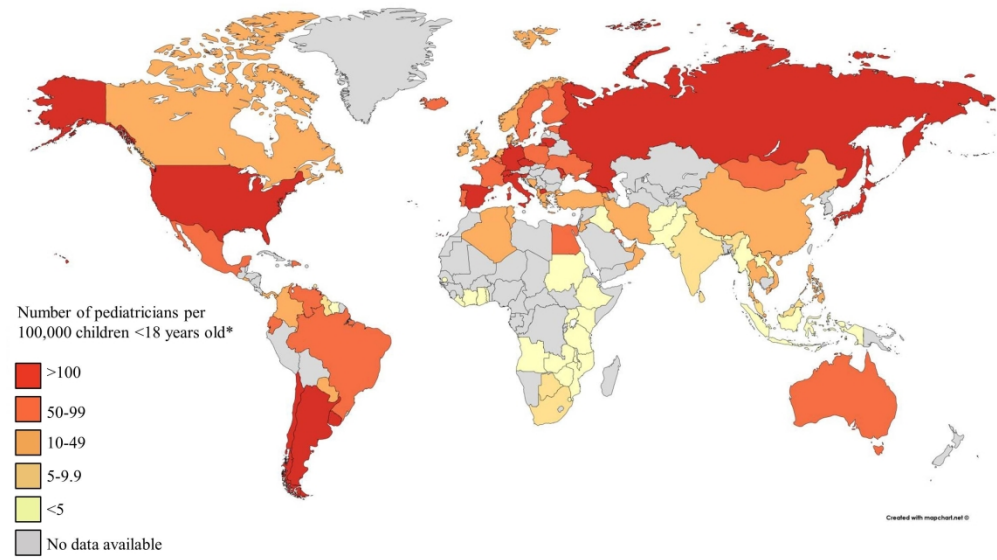

\*Data Source: UNICEF Country Statistics

254x190mm (300 x 300 DPI)

Figure 2: Type of provider seen for Primary Care

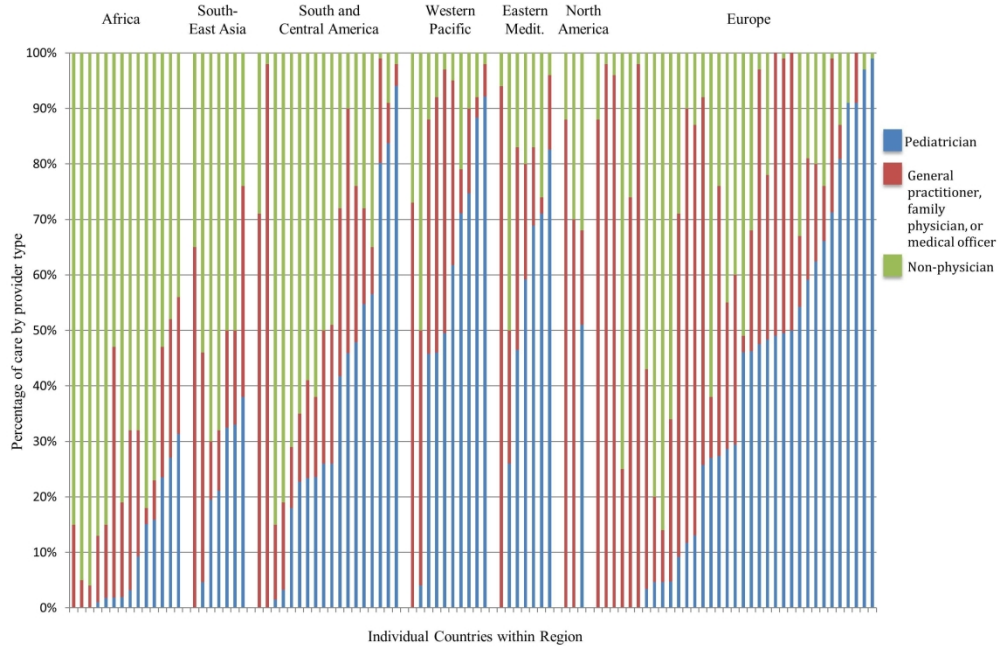

254x190mm (300 x 300 DPI)



# International Pediatrics Survey

1  
2  
3  
4  
5  
6  
7  
8  
9  
10  
11  
12  
13  
14  
15  
16  
17  
18  
19  
20  
21  
22  
23  
24  
25  
26  
27  
28  
29  
30  
31  
32  
33  
34  
35  
36  
37  
38  
39  
40  
41  
42  
43  
44  
45  
46  
47  
48  
49  
50  
51  
52  
53  
54  
55  
56  
57  
58  
59  
60

Please complete the survey below.

Thank you!

This survey is designed to learn more about how many pediatricians are practicing, who provides medical care for children, and how pediatricians are trained in your country.

Some of the questions ask for specific numbers and may be difficult for you to answer. Please answer to the best of your knowledge. If there is someone who would be better able to answer a question in your country, please tell us their contact information by emailing [beth.harper@childrens.harvard.edu](mailto:beth.harper@childrens.harvard.edu) or in the comment box at the end of the survey. Thankyou!

What language do you prefer for this survey?  English

Country Name \_\_\_\_\_

Your email address \_\_\_\_\_

## General Practice Information

In [country], is there specific clinical care for children, separate from care for adults?

- Yes  
 No

At approximately what age do children in [country] transition out of specific pediatric care to adult care?

- < 10 years  
 10-12 years  
 13-15 years  
 16-18 years  
 19-21 years  
 >21 years  
(Years)

Do children in [country] receive regular preventative and promotive care throughout childhood (well-child checks, growth monitoring, nutrition assessment, parenting advice, anticipatory guidance, immunization) by either a physician or non-physician health care provider?

- Yes  
 No

If a child is receiving regular preventative and promotive care in [country], what type of provider will he or she see?

|                                                                                     |                                                    |                               |
|-------------------------------------------------------------------------------------|----------------------------------------------------|-------------------------------|
| Non-physician<br>provider 100% of<br>the time                                       | Non-physician<br>provider and<br>Physician equally | Physician 100% of<br>the time |
| 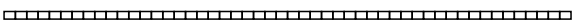 |                                                    |                               |

(Place a mark on the scale above)

If a child is seeing a PHYSICIAN for regular preventative or promotive care in [country], what type of physician will he or she most often see?

|                                                                                      |                                                                                             |                                  |
|--------------------------------------------------------------------------------------|---------------------------------------------------------------------------------------------|----------------------------------|
| General<br>physician, Family<br>physician, or<br>Medical officer<br>100% of the time | General<br>physician, Family<br>physician,<br>Medical officer<br>OR Pediatrician<br>equally | Pediatrician 100%<br>of the time |
| 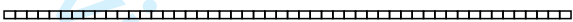 |                                                                                             |                                  |

(Place a mark on the scale above)

1 **In [country], if you visited the following types of institutions, how likely is it that a Pediatrician**  
2 **would be working there?**  
3

- 4  
5  
6  
7 General or primary care clinic
- 8 Public or Government-run
- 9 hospital
- 10 Faith-Based hospital
- 11 Private hospital
- 12 Academic/referral center
- 13  
14  
15  
16  
17  
18  
19  
20  
21  
22  
23  
24  
25  
26  
27  
28  
29  
30  
31  
32  
33  
34  
35  
36  
37  
38  
39  
40  
41  
42  
43  
44  
45  
46  
47  
48  
49  
50  
51  
52  
53  
54  
55  
56  
57  
58  
59  
60

Confidential: For Review Only

---



---

## 1 Pediatrics Workforce

2  
3  
4 Approximately how many pediatricians (including  
5 pediatricians and pediatric sub-specialists) are  
6 currently working in [country]?

(If unable to estimate, please leave blank. Please  
estimate number of persons, even if part-time.)

7  
8  
9 Please check all of the types of pediatric  
10 subspecialty care that are currently available in  
11 [country].

- Adolescent Medicine
- Pediatric Allergist
- Pediatric Anesthesiologist
- Pediatric Cardiologist
- Child Development/Developmental Medicine
- Pediatric Dermatologist
- Pediatric Ear, Nose, and Throat surgeon
- Pediatric Endocrinologist
- Pediatric Gastroenterologist
- Geneticist
- Pediatric Hematologist Pediatric
- Immunologist Pediatric
- Infectious Disease Pediatric
- Intensivist (PICU) Metabolic
- Disease Specialist Pediatric
- Nephrologist / Renal
- Neonatologist (NICU) Pediatric
- Neurologist Pediatric Oncologist
- Pediatric Ophthalmologist
- Pediatric Orthopedist
- Pediatric Pulmonologist
- Pediatric Psychiatrist
- Pediatric Rheumatologist
- Pediatric Surgeon Pediatric
- Urologist
- (Please select all that apply)

1 **What percentage of pediatricians working in [country] work in the following areas?**

2

3

|                                         | None                  | < 5%                  | 5-25%                 | 25-50%                | 50-75%                | 75-95%                | >95%                  | 100%                  |
|-----------------------------------------|-----------------------|-----------------------|-----------------------|-----------------------|-----------------------|-----------------------|-----------------------|-----------------------|
| 4 Public Sector only                    | <input type="radio"/> |
| 6 Private Sector only                   | <input type="radio"/> |
| 8 Both in the Public and Private Sector | <input type="radio"/> |

9

10

11

12 Approximately how many NEW pediatricians are entering  
13 the workforce in [country] each year?

(If unable to estimate, please leave blank)

14 Based upon the number of NEW and RETIRING  
15 pediatricians each year in [country], what are  
16 workforce expectations over the next 10 years?

- 17  Increase
- 18  Decrease
- 19  Stable

20

21

22

23

24

25

26

27

28

29

30

31

32

33

34

35

36

37

38

39

40

41

42

43

44

45

46

47

48

49

50

51

52

53

54

55

56

57

58

59

60

Confidential: For Review Only

**Education and Training in Pediatrics**

1  
2 Are there post-graduate training programs in  Yes  
3 Pediatrics in [country]?  No  
4

5  
6 How many post-graduate training programs in \_\_\_\_\_  
7 pediatrics are there in [country]?  
8

9  
10 Is there a published directory or list of these  Yes  
11 programs?  No

12  
13 Is this directory or list available on the internet?  Yes No  
14

15 Please list the website or provide a link: \_\_\_\_\_  
16

17  
18 Is there someone we may contact to obtain the  Yes  
19 directory or list?  No  
20

21  
22 Please include the name and contact information  
23 below: \_\_\_\_\_  
24  
25

26 Please list as many of the programs as possible,  
27 along with contact information if available. \_\_\_\_\_  
28  
29

30  
31 Is there a national or regional accreditation  Yes  
32 organization that accredits programs in [country]?  No  
33

34 What is the name of the accrediting organization or \_\_\_\_\_  
35 organizations?  
36

37  
38 Are any of the programs in [country] accredited?  Yes - all Yes -  
39  some No  
40

41  
42 The following questions aim to understand how many years of training it takes to become a pediatrician in [country].  
43

44 Is a university degree required prior to beginning  Yes  
45 medical school?  No  
46  
47  
48  
49  
50  
51  
52  
53  
54  
55  
56  
57  
58  
59  
60

1  
2  
3  
4  
5  
6  
7  
8  
9  
10  
11  
12  
13  
14  
15  
16  
17  
18  
19  
20  
21  
22  
23  
24  
25  
26  
27  
28  
29  
30  
31  
32  
33  
34  
35  
36  
37  
38  
39  
40  
41  
42  
43  
44  
45  
46  
47  
48  
49  
50  
51  
52  
53  
54  
55  
56  
57  
58  
59  
60

How many years of medical school, at a minimum, are required?

---

How many years of general medicine training or internship that is not specific to pediatrics?

---

How many years of post-graduate training specific to pediatrics?

---

Is additional supervised time in practice required to register as a specialist?

- Yes
- No

How many years of additional supervised practice is required to register as a specialist?

---

In [country], are there national standardized guidelines/requirements for postgraduate pediatric training?

- Yes
- No

Is there a standardized curriculum (i.e., national curriculum) in place for pediatric post-graduate training programs?

- Yes
- No

What body is in charge of the standardized (i.e. national) curriculum?

---

Is there a published resource of post-graduate training program requirements?

- Yes
- No

Please include a link to the website for this resource or contact information

---

Are there pediatric sub-specialty training opportunities in your country?

- Yes
- No

(We define sub-specialty training as training within a particular field of pediatrics, for example pediatric endocrinology or pediatric cardiology)

1  
2  
3  
4  
5  
6  
7 Please check all of the pediatric sub-specialties for  
8 which there are training programs in [country].  
9

- Adolescent Medicine
  - Pediatric Allergist Pediatric
  - Anesthesiologist Pediatric
  - Cardiologist
  - Child Development/Developmental Medicine
  - Pediatric Dermatologist
  - Pediatric Ear, Nose, and Throat surgeon
  - Pediatric Endocrinologist
  - Pediatric Gastroenterologist
  - Geneticist
  - Pediatric Hematologist Pediatric
  - Immunologist Pediatric
  - Infectious Disease Pediatric
  - Intensivist (PICU) Metabolic
  - Disease Specialist Pediatric
  - Nephrologist / Renal
  - Neonatologist (NICU) Pediatric
  - Neurologist Pediatric Oncologist
  - Pediatric Ophthalmologist
  - Pediatric Orthopedist
  - Pediatric Pulmonologist
  - Pediatric Psychiatrist
  - Pediatric Rheumatologist
  - Pediatric Surgeon Pediatric
  - Urologist
- 10  
11  
12  
13  
14  
15  
16  
17  
18  
19  
20  
21  
22  
23  
24  
25  
26  
27  
28  
29  
30 (Select all that apply)  
31  
32  
33  
34  
35  
36  
37  
38  
39  
40  
41  
42  
43  
44  
45  
46  
47  
48  
49  
50  
51  
52  
53  
54  
55  
56  
57  
58  
59  
60



1  
2  
3  
4  
5  
6  
7  
8  
9  
10  
11  
12  
13  
14  
15  
16  
17  
18  
19  
20  
21  
22  
23  
24  
25  
26  
27  
28  
29  
30  
31  
32  
33  
34  
35  
36  
37  
38  
39  
40  
41  
42  
43  
44  
45  
46  
47  
48  
49  
50  
51  
52  
53  
54  
55  
56  
57  
58  
59  
60

---

We greatly appreciate any additional information, clarifications, or comments you may have! Please tell us about them here.

---

THANK YOU for your participation! You will receive a copy of the report when available. If you have additional questions or concerns, please enter them below or email us at [beth.harper@childrens.harvard.edu](mailto:beth.harper@childrens.harvard.edu)

Confidential: For Review Only

# BMJ Paediatrics Open

## Where are the Paediatricians? An International Survey to Understand the Global Paediatric Workforce

|                               |                                                                                                                                                                                                                                                                                                                                                                                |
|-------------------------------|--------------------------------------------------------------------------------------------------------------------------------------------------------------------------------------------------------------------------------------------------------------------------------------------------------------------------------------------------------------------------------|
| Journal:                      | <i>BMJ Paediatrics Open</i>                                                                                                                                                                                                                                                                                                                                                    |
| Manuscript ID                 | bmjpo-2018-000397.R1                                                                                                                                                                                                                                                                                                                                                           |
| Article Type:                 | Original article                                                                                                                                                                                                                                                                                                                                                               |
| Date Submitted by the Author: | 17-Dec-2018                                                                                                                                                                                                                                                                                                                                                                    |
| Complete List of Authors:     | HARPER, BETH; Boston Children's Hospital, Nganga, Waceke; Aga Khan University - Kenya<br>Armstrong, Robert; Aga Khan University - Kenya<br>Forsyth, Kevin; Flinders University Faculty of Medicine Nursing and Health Sciences<br>Ham, Hazen; Global Pediatric Education Consortium<br>Keenan, William; Saint Louis University<br>Russ, Christiana; Children's Hospital Boston |
| Keywords:                     | Paediatric Staffing, Health Service                                                                                                                                                                                                                                                                                                                                            |
|                               |                                                                                                                                                                                                                                                                                                                                                                                |

SCHOLARONE™  
Manuscripts

## Where are the Paediatricians? An International Survey to Understand the Global Paediatric Workforce

Beth D. Harper,<sup>1</sup> Waceke Nganga,<sup>2</sup> Robert Armstrong,<sup>2</sup> Kevin D. Forsyth,<sup>3</sup> Hazen P. Ham,<sup>4</sup> William J. Keenan,<sup>5</sup> Christiana M. Russ<sup>1</sup>

**Affiliations:** <sup>1</sup>Boston Children's Hospital, Boston, USA; <sup>2</sup>Aga Khan University, Nairobi, Kenya; <sup>3</sup>Flinders University, Australia; <sup>4</sup>Global Pediatric Education Consortium, Chapel Hill, USA; <sup>5</sup>Saint Louis University, St. Louis, USA

**Address correspondence to:** Beth D. Harper, Department of Pediatrics, Boston Children's Hospital, 300 Longwood Ave, Boston MA 02115, [beth.harper@childrens.harvard.edu](mailto:beth.harper@childrens.harvard.edu), 617-355-6000

**Funding Source:** This research received no specific grant from any funding agency in the public, commercial or not-for-profit sectors.

**Financial Disclosure:** All authors have no financial relationships relevant to this article to disclose.

**Potential Conflicts of Interest:** The authors have no conflicts of interest relevant to this article to disclose.

### Abbreviations:

Sustainable Development Goals – SDGs

Gross Domestic Product – GDP

Interquartile Range – IQR

International Pediatric Association - IPA

### Contributors' Statement Page

Dr. Harper and Dr. Russ conceptualized and designed the study, designed the data collection instruments, coordinated and supervised data collection, drafted the initial manuscript, and reviewed and revised the manuscript.

Dr. Nganga, Dr. Armstrong, Dr. Forsyth coordinated data collection, reviewed and revised the manuscript.

Dr. Ham assisted with design of the data collection instrument including piloting, and reviewed and revised the manuscript.

Dr. Keenan advised the international approach, aided with data collection, reviewed and revised the manuscript.

1  
2  
3 All authors approved the final manuscript as submitted and agree to be accountable for all  
4 aspects of the work.  
5  
6  
7

## 8 **Abstract**

10 **Objective:** Our primary objective was to examine the global paediatric workforce and to better  
11 understand geographic differences in the number of paediatricians globally. Secondary  
12 objectives were to describe paediatric workforce expectations, who provides children with  
13 preventative care, and when children transition out of paediatric care.  
14  
15

16 **Design:** Survey of identified paediatric leaders in each country.  
17

18 **Setting:** Paediatric association leaders worldwide  
19

20 **Main outcome measures:** Paediatrician numbers, provision of primary care for children, age of  
21 transition to adult care.  
22  
23

24 **Results:** Responses were obtained from 121 countries (73% of countries approached). The  
25 number of paediatricians per 100,000 children ranged from a median of 0.5 (IQR 0.3-1) in low  
26 income countries to 72 (IQR 4-118) in high income countries. Africa and South-East Asia  
27 reported the lowest paediatrician density (median of 0.8 paediatricians per 100,000 children, IQR  
28 0.4-3 and median of 4, IQR 3-9, respectively), and fewest paediatricians entering the workforce.  
29 82% of countries reported transition to adult care by age 18 and 39% by age 15. Most countries  
30 (91%) but only 64% of low income countries reported provision of paediatric preventative care  
31 ( $p < 0.001$ , Cochran-Armitage trend test). Systems of primary care provision varied widely. A  
32 majority of countries (63%) anticipated increases in their paediatric workforce in the next  
33 decade.  
34  
35  
36  
37

38 **Conclusions:** Paediatrician density mirrors known inequities in health provider distribution.  
39 Fewer paediatricians are entering the workforce in areas with already low paediatrician density,  
40 which may exacerbate disparities in child health outcomes. In some regions, children transition  
41 to adult care during adolescence, with implications for health care training and delivery.  
42 Paediatrician roles are heterogeneous worldwide, and country-specific strategies should be  
43 utilized to address inequity in child health provision.  
44  
45  
46  
47  
48  
49  
50  
51  
52  
53  
54  
55  
56  
57  
58  
59  
60

**What is Known about This Subject:**

Significant discrepancy between burden of disease and distribution of health professionals has been documented.

Various structures are in place for paediatric care across the globe.

The global distribution of pediatricians, their role in providing care to children and the structure for child health systems in various countries are not known.

**What This Study Adds:**

There are inequities in both paediatrician distribution and numbers of new paediatricians entering the workforce in areas with high child mortality.

Most countries provide some regular primary care for children, but the systems to provide that care are highly variable.

In many areas, children transition from paediatric care in early adolescence, with implications for training and care delivery.

## Introduction

The discrepancy between the global burden of disease and the distribution of health professionals has been well-described.(1-9) Areas with the highest disease burden have the lowest percentage of health professionals, exacerbating the impact of the health workforce deficit. The World Health Organization has identified an index of 4.45 health workers (physicians, nurses, and midwives) per 1000 population necessary to meet the Sustainable Development Goals (SDGs) by 2030.(6) Countries are called on to set specific targets for numbers of health workers including physicians and health specialists depending upon their needs and health services structure.

Child health was a focal point in the Millennium Development Goals and continues to be important in the SDGs. Epidemiologic shifts towards non-communicable diseases, a renewed focus on optimizing child development, the unique health needs of adolescents, and emphasis on reducing morbidity not just mortality, all require renewed deliberation about how health care for children is delivered and advanced.(10-12) Differing health system designs lead to wide variability in the roles that paediatricians and other child health providers fill in supporting the health of a country's children. Understanding those roles is vital to providing equitable and quality health care and to developing appropriate training competencies for all child health professionals.

Some regional efforts have been undertaken to understand where paediatricians are working and what roles they play, but the paediatric workforce worldwide has not been previously described.(6, 13-15) Similarly, while health systems have been described on country and sometimes regional levels, a global understanding of health care systems for children and their variation can provide valuable information for potential reforms at country level.

1  
2  
3 The goal of this study was to examine the global status of the paediatric workforce and to  
4 better understand geographic differences in the types of work that paediatricians undertake in the  
5 provision of child health care. Our objectives were to identify the number of paediatricians  
6 globally, examine paediatric workforce expectations, understand who provides children with  
7 regular promotive and preventative care, and to learn when children transition out of paediatric  
8 care to adult care.  
9  
10  
11  
12  
13  
14  
15  
16  
17  
18

## 19 **Methods**

### 20 *Survey development*

21  
22  
23  
24  
25 An online survey was developed using REDCap, an electronic survey tool.(16) The  
26 survey queried the number of paediatricians per country, expected workforce changes, primary  
27 care provision for children, and age of transition to adult care. (Supplement 1) Faculty at Boston  
28 Children's Hospital initially piloted the survey with cognitive interviewing to improve question  
29 clarity. The refined survey was further piloted and edited with paediatric leaders within the  
30 Global Paediatric Education Consortium representing Europe, Asia, Africa, and the Middle  
31 East.(17) As the internationally agreed upon languages for communication between paediatric  
32 societies in the International Paediatric Association (IPA) are English, French and Spanish, the  
33 final survey was translated into French and Spanish by DR Interpreting, Inc. Translated surveys  
34 were sent to native French and Spanish speakers to confirm accuracy of the translation.  
35  
36  
37  
38  
39  
40  
41  
42  
43  
44  
45  
46  
47  
48

### 49 *Patient and public involvement*

50  
51  
52 Patients and the public were not directly involved in the design of this study.  
53  
54  
55  
56  
57  
58  
59  
60

### *Study Sample*

The survey was distributed to identified paediatric leaders with a goal of attaining one response per country or economy. Countries and economies for inclusion were defined as the 193 UN member countries plus the 5 World Bank Economies (Hong Kong, Macau, Palestine, Puerto Rico and Taiwan) with populations of over 500,000 people, for a total of 198 countries and economies. The survey was initially distributed in May 2015 via email to the lead delegates from the 121 countries with active membership in the IPA at that time. Regional and subspecialty societies that did not function at the country level were excluded. The survey was sent to non-respondents each week for three consecutive weeks. In a second phase, contact was made with paediatric leaders within the non-responding countries, as well as an additional 45 countries in which paediatric leadership was identified through contacts known to the author group, networks from the Global Paediatric Education Consortium, International Paediatric Academic Leaders Association, Harvard University, the American Academy of Paediatrics Section of International Child Health, or through contacts with country Ministries of Health. Paediatric leaders from non-responding countries who were in attendance at the International Paediatric Congress in August 2016 were also identified and approached.

A majority of countries (73) had a single response. Of those countries with duplicate responses to the survey, 30 had only one complete response and 17 required further review by the authors (BH and CR). Of those, seven countries had identical duplicate responses, or the response that was most complete was selected. Ten countries were contacted to clarify duplicate responses, and 9 clarified. One country had two responses with some variation, and the respondents could not be reached for clarification; for that country the response from the president of the country's paediatric association was used.



Country statistics for populations under age 18 were obtained from publically available UNICEF country statistics.(18) Income and GDP classifications were based on 2016 World Bank groupings.

### *Statistical Analysis*

Paediatric workforce characteristics were described using frequencies, medians and interquartile ranges where appropriate. Comparisons between regions were calculated using Kruskal-Wallis tests and Fisher's exact tests, while comparisons between GDP categories were calculated using Cuzick's non-parametric tests for trend and Cochran-Armitage trend tests. Data was analyzed using Stata (StataCorp. 2015. *Stata Statistical Software: Release 14*. College Station, TX: StataCorp LP).

The study protocol was reviewed by the Institutional Review Board at Boston Children's Hospital and deemed not human subjects research.

### **Results**

Responses were received from 95 (79%) of the 121 countries with IPA membership, and 121 (73%) of the 166 total countries and economies for which a contact was identified. (Supplement 2). In total, this represented 61% of the global 198 countries and economies. Eight countries responded in French, ten in Spanish, and the remainder in English.

There were 32 countries for whom no contact was identified and therefore no survey sent, and 45 countries that did not respond to the survey (Table 1). No contact identified and non-responder countries did not vary significantly from responder countries by GDP ( $p=0.18$ , Fisher's exact test), but did vary by region ( $p=0.002$ , Fisher's exact test), with more no contact

1  
2  
3 identified countries located in the Western Pacific, and more non-responders in Africa. Countries  
4 with no contact identified had significantly smaller populations than those targeted, with a  
5 median population of 274,000 as compared with a median population of 10 million in responder  
6 countries ( $p < 0.001$ , Kruskal-Wallis test).  
7  
8  
9  
10  
11  
12

13 The number of paediatricians reported was normalized against the population of children  
14 under 18 years old in each country to obtain a paediatrician density ratio (Figure 1).  
15 Paediatrician density varied significantly by GDP, ranging from a median of 0.5 paediatricians  
16 per 100,000 children in low income countries to a median of 72 paediatricians per 100,000  
17 children in high income countries ( $p < 0.001$ , Nonparametric trend test, Table 2). In addition,  
18 significant variability was seen by region ( $p < 0.001$ , Kruskal-Wallis test, Table 3). The lowest  
19 density was seen in Africa (median of 0.8 paediatricians per 100,000 children, interquartile range  
20 (IQR) 0.4-3) and South-East Asia (median of 4 paediatricians per 100,000 children, IQR 3-9) as  
21 compared with a global median of 32 paediatricians per 100,000 children (IQR 5-74 and 59 and  
22 87 per 100,000 children (IQR 38 109, and 49-135) in North America and Europe, respectively.  
23  
24  
25  
26  
27  
28  
29  
30  
31  
32  
33  
34  
35  
36

37 The number of new paediatricians entering the workforce also varied by GDP  
38 classification ( $p = 0.01$ , Nonparametric trend test) and by region ( $p < 0.001$ , Kruskal-Wallis test).  
39 In low income countries, the paediatric workforce gained a median of 10 new paediatricians per  
40 year, or 0.08 per 100,000 children, while in high income countries the median was 60 new  
41 paediatricians per year, or 3 per 100,000 children (Table 2). In Africa, countries anticipated a  
42 median of 5 new paediatricians (0.08 per 100,000 children) per year as compared to a global  
43 median of 30 (1.44 paediatricians per 100,000 children) (Table 3).  
44  
45  
46  
47  
48  
49  
50  
51  
52  
53  
54  
55  
56  
57  
58  
59  
60

1  
2  
3 Age of transition out of paediatric care did not vary by gross domestic product (GDP,  
4 Table 2) but did vary by region ( $p < 0.001$ , Fisher's exact test, Table 3). Notably, in South-East  
5 Asia, Africa, and the Eastern Mediterranean, over 65% of countries reported that children  
6 transitioned from paediatric care by age 15 years, whereas less than 45% of countries reported  
7 transition by age 15 in South and Central America and less than 15% in Europe, North America,  
8 and the Western Pacific.  
9

10  
11 Most countries (91%) responded affirmatively when asked "*do children in your country*  
12 *receive regular preventative and promotive care throughout childhood (well-child checks,*  
13 *growth monitoring, nutrition assessment, parenting advice, anticipatory guidance,*  
14 *immunization) by either a physician or non-physician health care provider?"* This rate was  
15 considerably lower in low-income countries, where only 64% of countries reported regular  
16 primary care ( $p < 0.001$ , Cochran-Armitage trend test, Table 2). The type of provider seen for  
17 primary paediatric care varied (Figure 2). Worldwide, children see non-physicians as the  
18 primary care provider a median of 28% of the time (Table 2, Table 3, IQR 9-59%). If children  
19 saw a physician, that person was a paediatrician (rather than general physician, family physician  
20 or medical officer) a median of 33% of the time.  
21  
22  
23  
24  
25  
26  
27  
28  
29  
30  
31  
32  
33  
34  
35  
36  
37  
38  
39  
40

## 41 Discussion

42  
43  
44  
45 This international survey of paediatricians is the first, to our knowledge, to report data on  
46 paediatrician density and the roles that paediatricians play in provision of care for children on a  
47 global scale. This study identified wide variability in paediatrician density, consistent with health  
48 workforce findings of physicians as a whole.(5, 8, 19) Areas with the highest burden of  
49 paediatric mortality and morbidity had the lowest paediatrician density, and paediatricians are  
50  
51  
52  
53  
54  
55  
56  
57  
58  
59  
60

1  
2  
3 joining the workforce at lower rates in those same regions. One reason for this inequity may be  
4  
5 the existence of a training capacity gap, with fewer avenues to train paediatricians or fewer  
6  
7 opportunities for employment in areas with an already low workforce. Some high-income  
8  
9 countries have already undertaken more detailed analysis of their paediatric workforce, and used  
10  
11 this to inform investment and education policy.(14, 20-24)  
12  
13  
14

15  
16 Another explanation could be the impact of internal or external migration on access to  
17  
18 paediatric care. Both have multiple drivers, including job satisfaction, healthy work  
19  
20 environment, adequate supplies, feeling of support, and appropriate recognition.(2, 25, 26)  
21  
22 Within countries, there is often a significant misdistribution of health care professionals towards  
23  
24 large, wealthy urban areas.(1, 2, 25, 27) More detailed data on intra-national distribution of  
25  
26 paediatricians would be valuable in understanding and seeking to address these disparities of  
27  
28 access. Migration between countries has also been well documented.(1, 2, 8, 26) While there are  
29  
30 no clear data on the impact of this 'brain drain' in paediatrics, in both the United States and UK,  
31  
32 it is estimated that one-third of the paediatrician workforce are international medical  
33  
34 graduates.(28, 29) Specific efforts to reverse these trends include a focus on providing access to  
35  
36 medical training to students from low resource settings, as exemplified by the Latin American  
37  
38 School of Medicine (ELAM) in Cuba, and efforts to develop pediatric residency programs in low  
39  
40 and middle income countries.(30, 31) Additional efforts to improve salaries, work environments  
41  
42 and career opportunities may also be effective means of decreasing external migration.(32-34)  
43  
44  
45  
46  
47

48  
49 This study identified that many children transition from paediatric care to adult care by  
50  
51 age 15, relatively early in adolescence. Age of transition varied by region but not by country  
52  
53 income, suggesting that it may be more associated with cultural or professional norms around  
54  
55 transition to adulthood rather than workforce planning. Improved understanding of the systems  
56  
57  
58  
59  
60

1  
2  
3 of care for adolescents is critical among UN, WHO and Lancet Commission calls for increased  
4 focus, expertise and research on adolescent-specific care.(10-12) With early transition to adult  
5 care, advancing the adolescent health agenda may require a defined framework for adolescent  
6 services and multisectoral approach that engages youth within their communities.  
7  
8  
9  
10

11  
12  
13 Our study demonstrated that while most countries offered some form of broadly defined  
14 preventive care to children, this primary care role is often filled by non-physicians or generalists.  
15 In both high and low income countries, task shifting and task sharing have been important and  
16 often successful methods for improving access to care and addressing health costs while  
17 retaining quality of care.(35-39) Most countries continue to explore the appropriate skills mix for  
18 providing care, particularly in community settings. Optimizing this skills mix will require inter-  
19 professional collaboration and training to promote successful multidisciplinary primary care.  
20 System planning needs to account for and support the primary role of family and the informal  
21 care structures that may exist in communities. A thoughtful country-level approach is required to  
22 balance development of preventive and community interventions, alongside secondary and  
23 tertiary level services with appropriate referral structures.  
24  
25  
26  
27  
28  
29  
30  
31  
32  
33  
34  
35  
36  
37  
38  
39

40 Workforce studies, including this one, may not capture all of the specific roles that health  
41 professionals play, including leadership in health care systems, policy, and government;  
42 educators and researchers in universities; and community advocates. A robust national workforce  
43 strategy needs to account for these roles, and country-level human resources for health planning  
44 should establish a target density for the paediatrician workforce in relation to their expected roles  
45 within the system. Designation of tasks such as provision of primary care and age of transition  
46 to adult care would need to be considered in order to appropriately define paediatric workforce  
47  
48  
49  
50  
51  
52  
53  
54  
55  
56  
57  
58  
59  
60

1  
2  
3 requirements. Analysis of skills mix needs should also incorporate anticipated epidemiologic  
4 changes including a reduction in infectious causes of under-5 mortality, an increase in the  
5 proportion of neonatal mortality, and a shift towards chronic diseases in children.(12, 40) As  
6 countries work to scale-up their health care workforce these baseline data can help inform  
7 development strategies.(41, 42)  
8  
9  
10  
11  
12  
13  
14

15 This study has several limitations. We found no validated tool that would appropriately  
16 meet our study objective, therefore developed the survey de novo. Despite piloting the survey  
17 among multiple countries, cultures, and languages, it is possible that some terms, while  
18 commonly used, may have been interpreted differently in different settings, particularly among  
19 respondents for whom French, English or Spanish was not their native language. All data were  
20 collected as survey responses, usually from a single representative in each country. While we  
21 targeted experts at the national paediatric association level who would have knowledge of the  
22 state of paediatrics and child health in that nation, responses could vary among individuals  
23 particularly for more subjective questions. While we achieved a high level of response globally,  
24 there were regional gaps, with particular low responses from West Africa and the Western  
25 Pacific. Countries with low physician density and population were similarly underrepresented in  
26 this sample. These challenges may have been due to language or internet access difficulties,  
27 absence of or less active national paediatric organization or simply limited paediatric presence in  
28 those countries. This study was focused on paediatricians, a small component in any country of  
29 the human workforce related to child health and health systems. However, paediatricians are  
30 important resources for countries, with substantial understanding of child health needs who can  
31 also help support country development of child health services and provide guidance for the  
32 continuum of care for children and families.  
33  
34  
35  
36  
37  
38  
39  
40  
41  
42  
43  
44  
45  
46  
47  
48  
49  
50  
51  
52  
53  
54  
55  
56  
57  
58  
59  
60

## Conclusion

As the global community seeks universal health coverage and works to address the known shortage in healthcare workers, care should be taken to meet the health workforce needs of the world's children and adolescents. Clarification of paediatrician roles and accompanying skill mix is important in developing health workforce capacity to meet those needs. This study described the state of the paediatric workforce worldwide with notable variability in paediatrician density and roles in different countries. A training capacity gap in countries with high disease burdens may exacerbate the problem of a small workforce relative to healthcare needs. These findings highlight the need for country specific child health workforce strategies, assisted by the development of standardized tools to monitor health care capacity and outcomes as countries focus on meeting the SDGs for child health.

### Acknowledgements

The authors wish to thank Edgar Vesga for his assistance with survey implementation, members of the Global Pediatric Education Consortium who piloted the survey, Julie Hurlbut for assistance with data analysis, tables and figures, Lisa Asaro and David Wypij for assistance with statistical analysis, and Judith Palfrey for editing.

Confidential: For Review Only



## References

1. Chen C, Buch E, Wassermann T, Frehywot S, Mullan F, Omaswa F, et al. A survey of Sub-Saharan African medical schools. *Hum Resour Health*. 2012;10:4.
2. Kasper J, Bajunirwe F. Brain drain in sub-Saharan Africa: contributing factors, potential remedies and the role of academic medical centres. *Archives of disease in childhood*. 2012;97(11):973-9.
3. Liu JX, Goryakin Y, Maeda A, Bruckner T, Scheffler R. Global Health Workforce Labor Market Projections for 2030. *Hum Resour Health*. 2017;15(1):11.
4. Baker T. Pediatric emergency and critical care in low-income countries. *Paediatric anaesthesia*. 2009;19(1):23-7.
5. Shehu BB, Ameh EA. Poverty and disease burden vs medical education in sub-Saharan Africa. *Annals of African medicine*. 2007;6(4):139-41.
6. WHO. Health workforce Requirements for Universal health coverage and the sustainable development goals. . *Human Resources for Health Observer Series* 2016;17.
7. Pozo-Martin F, Nove A, Lopes SC, Campbell J, Buchan J, Dussault G, et al. Health workforce metrics pre- and post-2015: a stimulus to public policy and planning. *Hum Resour Health*. 2017;15(1):14.
8. Crisp N, Chen L. Global supply of health professionals. *The New England journal of medicine*. 2014;370(10):950-7.
9. Frenk J, Chen L, Bhutta ZA, Cohen J, Crisp N, Evans T, et al. Health professionals for a new century: transforming education to strengthen health systems in an interdependent world. *Lancet (London, England)*. 2010;376(9756):1923-58.
10. Patton GC, Sawyer SM, Santelli JS, Ross DA, Afifi R, Allen NB, et al. Our future: a Lancet commission on adolescent health and wellbeing. *Lancet (London, England)*. 2016;387(10036):2423-78.
11. Every Woman Every Child: The Global Strategy for Women's, Children's and Adolescents' Health (2016-2030). 2016.
12. Kyu HH, Pinho C, Wagner JA, Brown JC, Bertozzi-Villa A, Charlson FJ, et al. Global and National Burden of Diseases and Injuries Among Children and Adolescents Between 1990 and 2013: Findings From the Global Burden of Disease 2013 Study. *JAMA pediatrics*. 2016;170(3):267-87.
13. van Esso D, del Torso S, Hadjipanayis A, Biver A, Jaeger-Roman E, Wettergren B, et al. Paediatric primary care in Europe: variation between countries. *Archives of disease in childhood*. 2010;95(10):791-5.
14. Woodhead M. China to train 22,000 more paediatricians in next four years. *BMJ (Clinical research ed)*. 2016;352:i1376.
15. Ehrich JH, Tenore A, del Torso S, Pettoello-Mantovani M, Lenton S, Grossman Z. Diversity of Pediatric Workforce and Education in 2012 in Europe: A Need for Unifying Concepts or Accepting Enjoyable Differences? *The Journal of pediatrics*. 2015;167(2):471-6.e4.
16. Harris PA, Taylor R, Thielke R, Payne J, Gonzalez N, Conde JG. Research electronic data capture (REDCap)--a metadata-driven methodology and workflow process for providing translational research informatics support. *Journal of biomedical informatics*. 2009;42(2):377-81.
17. Global Pediatric Education Consortium. [Available from: <http://www.globalpediatrics.org/>.
18. UNICEF. Country Statistics. [https://www.unicef.org/statistics/index\\_countrystats.html](https://www.unicef.org/statistics/index_countrystats.html). 2015.
19. WHO. Global strategy on human resources for health: workforce 2030. 2016.
20. Ranson MK, Chopra M, Atkins S, Dal Poz MR, Bennett S. Priorities for research into human resources for health in low- and middle-income countries. *Bulletin of the World Health Organization*. 2010;88(6):435-43.
21. McColgan M, Winch R, Clark SJ, Ewing C, Modi N, Greenough A. The changing UK paediatric consultant workforce: report from the Royal College of Paediatrics and Child Health. *Archives of disease in childhood*. 2017;102(2):170-3.

22. Freed GL, Moran LM, Van KD, Leslie LK. Current Workforce of General Pediatricians in the United States. *Pediatrics*. 2016;137(4).
23. Mullan F, Frehywot S. Non-physician clinicians in 47 sub-Saharan African countries. *Lancet* (London, England). 2007;370(9605):2158-63.
24. Hu KJ, Sun ZZ, Rui YJ, Mi JY, Ren MX. Shortage of paediatricians in China. *Lancet* (London, England). 2014;383(9921):954.
25. Leu HI, Chang WT, Lin MH, Chen TJ, Hwang SJ, Chou LF, et al. Urban-Rural Disparity in Geographical and Temporal Availability of Pediatric Clinics: A Nationwide Survey in Taiwan. *Pediatrics and neonatology*. 2016.
26. Bundred P, Gibbs T. Medical migration and Africa: an unwanted legacy of educational change. *Medical teacher*. 2007;29(9):893-6.
27. Shipman SA, Lan J, Chang CH, Goodman DC. Geographic maldistribution of primary care for children. *Pediatrics*. 2011;127(1):19-27.
28. Pediatrician workforce statement. *Pediatrics*. 2005;116(1):263-9.
29. RCPCH. RCPCH Medical Workforce Census 2013. 2014.
30. Huish R. Going where no doctor has gone before: the role of Cuba's Latin American School of Medicine in meeting the needs of some of the world's most vulnerable populations. *Public health*. 2008;122(6):552-7.
31. Ganapathi L, Martins Y, Schumann D, Russ C. Overcoming challenges to develop pediatric postgraduate training programs in low- and middle-income countries. *Education for health* (Abingdon, England). 2014;27(3):277-82.
32. Aluttis C, Bishaw T, Frank MW. The workforce for health in a globalized context--global shortages and international migration. *Global health action*. 2014;7:23611.
33. Taylor AL, Hwenda L, Larsen BI, Daulaire N. Stemming the brain drain--a WHO global code of practice on international recruitment of health personnel. *The New England journal of medicine*. 2011;365(25):2348-51.
34. Dayrit M, Taylor A, Yan J, Braichet JM, Zurn P, Taylor A, et al. WHO code of practice on the international recruitment of health personnel. *Bulletin of the World Health Organization*. 2008;86(10):739.
35. Penazzato M, Davies MA, Apollo T, Negussie E, Ford N. Task shifting for the delivery of pediatric antiretroviral treatment: a systematic review. *Journal of acquired immune deficiency syndromes (1999)*. 2014;65(4):414-22.
36. Sanne I, Orrell C, Fox MP, Conradie F, Ive P, Zeinecker J, et al. Nurse versus doctor management of HIV-infected patients receiving antiretroviral therapy (CIPRA-SA): a randomised non-inferiority trial. *Lancet* (London, England). 2010;376(9734):33-40.
37. Lynch S, Ford N, van Cutsem G, Bygrave H, Janssens B, Decroo T, et al. Public health. Getting HIV treatment to the most people. *Science* (New York, NY). 2012;337(6092):298-300.
38. WHO. Treat, Train, Retain. The AIDS and health workforce plan. 2006.
39. Fulton BD, Scheffler RM, Sparkes SP, Auh EY, Vujicic M, Soucat A. Health workforce skill mix and task shifting in low income countries: a review of recent evidence. *Hum Resour Health*. 2011;9:1.
40. Kanyuka M, Ndawala J, Mleme T, Chisesa L, Makwemba M, Amouzou A, et al. Malawi and Millennium Development Goal 4: a Countdown to 2015 country case study. *The Lancet Global health*. 2016;4(3):e201-14.
41. Mullan F, Frehywot S, Omaswa F, Buch E, Chen C, Greysen SR, et al. Medical schools in sub-Saharan Africa. *Lancet* (London, England). 2011;377(9771):1113-21.
42. Haley CA, Vermund SH, Moyo P, Kipp AM, Madzima B, Kanyowa T, et al. Impact of a critical health workforce shortage on child health in Zimbabwe: a country case study on progress in child survival, 2000-2013. *Health policy and planning*. 2017.

1  
2  
3  
4  
5  
6  
7  
8  
9  
10  
11  
12  
13  
14  
15  
16  
17  
18  
19  
20  
21  
22  
23  
24  
25  
26  
27  
28  
29  
30  
31  
32  
33  
34  
35  
36  
37  
38  
39  
40  
41  
42  
43  
44  
45  
46  
47  
48  
49  
50  
51  
52  
53  
54  
55  
56  
57  
58  
59  
60

Confidential: For Review Only

**Table 1: Characteristics of responder, non-responder, and no contact identified groups**

|                                                                        | Responder             | Non-responder        | No contact identified | <i>P</i> value |
|------------------------------------------------------------------------|-----------------------|----------------------|-----------------------|----------------|
| Countries, no. (%)                                                     | 121 (61)              | 45 (23)              | 32 (16)               |                |
| GDP classification <sup>1</sup>                                        |                       |                      |                       | 0.18*          |
| Low income, no. (%)                                                    | 14 (12)               | 12 (27)              | 5 (16)                |                |
| Lower middle income, no. (%)                                           | 30 (25)               | 12 (27)              | 8 (25)                |                |
| Upper middle income, no. (%)                                           | 34 (28)               | 12 (27)              | 12 (38)               |                |
| High income, no. (%)                                                   | 43 (36)               | 9 (20)               | 7 (22)                |                |
| Region <sup>2</sup>                                                    |                       |                      |                       | 0.002*         |
| Africa, no. (%)                                                        | 23 (19)               | 17 (38)              | 7 (21)                |                |
| South-East Asia, no. (%)                                               | 8 (7)                 | 1 (2)                | 1 (3)                 |                |
| South and Central America, no. (%)                                     | 19 (16)               | 8 (18)               | 5 (16)                |                |
| Western Pacific, no. (%)                                               | 12 (10)               | 4 (9)                | 13 (41)               |                |
| Eastern Mediterranean, no. (%)                                         | 15 (12)               | 6 (13)               | 0                     |                |
| North America, no. (%)                                                 | 3 (2)                 | 1 (2)                | 0                     |                |
| Europe, no. (%)                                                        | 41 (34)               | 8 (18)               | 6 (19)                |                |
| Country population, <sup>3</sup> median in thousands (IQR)             | 10,824 (4,503-43,417) | 7,237 (2,175-17,468) | 274 (98-1,208)        | <0.001**       |
| Country population <18 years, <sup>4</sup> median in thousands (IQR)   | 3,744 (1,081-14,144)  | 3,248 (798-9,500)    | 113 (27-581)          | 0.08**         |
| Number of physicians per 100,000 population, <sup>6</sup> median (IQR) | 158 (43-290)          | 62 (8-241)           | 46 (19-147)           | 0.002**        |

<sup>1</sup> World Bank list of economies (2017) [Internet]. World Bank. Available from: <http://databank.worldbank.org/data/download/site-content/CLASS.xls>

<sup>2</sup> Region classification based on "WHO regional offices." World Health Organization, World Health Organization, 2017, [www.who.int/about/regions/en/](http://www.who.int/about/regions/en/).

<sup>3</sup> Population, total. (2017, September 18). Retrieved October 09, 2017, from <https://data.worldbank.org/indicator/SP.POP.TOTL>

<sup>4</sup> The State of the World's Children 2016 Statistical Tables. (2016, June 27). Retrieved October 31, 2017, from <https://data.unicef.org/resources/state-worlds-children-2016-statistical-tables/>

<sup>6</sup> The 2016 update, Global Health Workforce Statistics, World Health Organization, Geneva (<http://www.who.int/hrh/statistics/hwfstats/>).

\* *P* values were calculated using Fisher's exact tests for categorical variables

\*\* *P* values were calculated using Kruskal-Wallis tests for continuous variables (based on chi-square statistics with 2 degrees of freedom.)

**Table 2: Results by GDP Classification**

|                                                                                                                                    | <b>World<br/>(N=121)</b> | <b>Low Income<br/>(N=14)</b> | <b>Lower Middle<br/>Income (N=30)</b> | <b>Upper Middle<br/>Income (N=34)</b> | <b>High Income<br/>(N=43)</b> | <b>P value</b> |
|------------------------------------------------------------------------------------------------------------------------------------|--------------------------|------------------------------|---------------------------------------|---------------------------------------|-------------------------------|----------------|
| Number of pediatricians per country, median (IQR)                                                                                  | 650 (180-3,500)          | 70 (25-200)                  | 600 (250-5,000)                       | 1,700 (256-6,000)                     | 1,400 (500-3,500)             | <0.001**       |
| Number of pediatricians per 100,000 children <18 years <sup>1</sup> , median (IQR)                                                 | 32 (5-74)                | 0.5 (0.3-1)                  | 6 (3-32)                              | 30 (15-60)                            | 72 (44-118)                   | <0.001**       |
| Number of new pediatricians entering the workforce each year per 100,000 children <18 years in country <sup>1</sup> , median (IQR) | 1.44 (0.42-3.07)         | 0.08 (0.03-0.18)             | 0.45 (0.02-0.93)                      | 1.36 (0.57-2.09)                      | 3.10 (2.05-4.06)              | 0.01**         |
| Number of countries reporting transition from pediatric care <sup>†</sup>                                                          |                          |                              |                                       |                                       |                               |                |
| by age 12 years, no. (%)                                                                                                           | 3 (3)                    | 0                            | 3 (10)                                | 0                                     | 0                             | 0.13*          |
| by age 15 years, no. (%)                                                                                                           | 47 (39)                  | 9 (64)                       | 15 (50)                               | 13 (39)                               | 10 (23)                       | 0.002*         |
| by age 18 years, no. (%)                                                                                                           | 98 (82)                  | 14 (100)                     | 27 (90)                               | 26 (79)                               | 31 (72)                       | 0.01*          |
| by age 21 years, no. (%)                                                                                                           | 118 (98)                 | 14 (100)                     | 30 (100)                              | 33 (100)                              | 41 (95)                       | 0.18*          |
| Countries reporting regular pediatric promotive and preventive care received, no. (%)                                              | 110 (91)                 | 9 (64)                       | 26 (87)                               | 33 (97)                               | 42 (98)                       | <0.001*        |
| Percentage of primary care provided by non-physician, median (IQR)                                                                 | 28 (9-58)                | 82 (70-85)                   | 34 (11-61)                            | 28.5 (2-51)                           | 24 (9-45)                     | 0.01**         |
| Percentage of primary care provided by general physician, family doctor, or medical officer, median (IQR)                          | 21 (11-36)               | 12 (7-16)                    | 24 (14-42)                            | 18 (10-27)                            | 23 (10-36)                    | 0.76**         |
| Percentage of primary care provided by pediatrician, median (IQR)                                                                  | 33 (13-57)               | 17 (8-22)                    | 30 (12-49)                            | 44 (23-56)                            | 46 (7-73)                     | 0.04**         |
| Number of physicians per 100,000 population, <sup>2</sup> median (IQR)                                                             | 158.1 (43.4-290.0)       | 6.6 (3.0-12.0)               | 76.6 (20.1-154.6)                     | 158.1 (85.4-246.3)                    | 299 (196.4-379.1)             | <0.001**       |

<sup>1</sup> The State of the World's Children 2016 Statistical Tables. (2016, June 27). Retrieved October 31, 2017, from <https://data.unicef.org/resources/state-worlds-children-2016-statistical-tables/>

<sup>2</sup> The 2016 update, Global Health Workforce Statistics, World Health Organization, Geneva (<http://www.who.int/hrh/statistics/hwfstats/>).

\*P values were calculated using Cuzick's nonparametric tests for trend for continuous variables (based on Z statistics with 1 degree of freedom).

\*\*P values were calculated using Cochran-Armitage trend tests for categorical variables (based on chi-square statistics with 1 degree of freedom).

† Age of transition from pediatric care not reported by one country in the upper middle income group.

**Table 3: Results by Region**

|    |                                                                                                                                               | <b>World<br/>(N=121)</b> | <b>Africa<br/>(N=23)</b> | <b>South-East<br/>Asia (N=8)</b> | <b>South and<br/>Central<br/>America<br/>(N=19)</b> | <b>Western<br/>Pacific<br/>(N=12)</b> | <b>Eastern<br/>Mediterranean<br/>(N=15)</b> | <b>North<br/>America<br/>(N=3)</b> | <b>Europe<br/>(N=41)</b>   | <b>P value</b> |
|----|-----------------------------------------------------------------------------------------------------------------------------------------------|--------------------------|--------------------------|----------------------------------|-----------------------------------------------------|---------------------------------------|---------------------------------------------|------------------------------------|----------------------------|----------------|
| 4  | GDP classification <sup>1</sup>                                                                                                               |                          |                          |                                  |                                                     |                                       |                                             |                                    |                            | <0.001*        |
| 5  | Low income, no. (%)                                                                                                                           | 14 (12)                  | 11 (48)                  | 1 (13)                           | 1 (5)                                               | 0                                     | 1 (7)                                       | 0                                  | 0                          |                |
| 6  | Lower middle income, no. (%)                                                                                                                  | 30 (25)                  | 6 (26)                   | 6 (75)                           | 4 (21)                                              | 5 (42)                                | 5 (33)                                      | 0                                  | 4 (10)                     |                |
| 7  | Upper middle income, no. (%)                                                                                                                  | 34 (28)                  | 5 (22)                   | 1 (13)                           | 12 (63)                                             | 1 (8)                                 | 4 (27)                                      | 1 (33)                             | 10 (24)                    |                |
| 8  | High income, no. (%)                                                                                                                          | 43 (36)                  | 1 (4)                    | 0                                | 2 (11)                                              | 6 (50)                                | 5 (33)                                      | 2 (67)                             | 27 (66)                    |                |
| 9  | Number of pediatricians per country,<br>10 median (IQR)                                                                                       | 650<br>(180-3,500)       | 70<br>(23-167)           | 500<br>(320-3,700)               | 1,200<br>(30-5,500)                                 | 2,900<br>(600-5,600)                  | 650<br>(425-3000)                           | 25,000<br>(2,667-<br>80,000)       | 1,545<br>(500-4,500)       | <0.001**       |
| 11 | Number of pediatricians per 100,000<br>12 children <18 years, <sup>2</sup> median (IQR)                                                       | 32 (5-74)                | 0.8 (0.4-3)              | 4 (3-9)                          | 47 (9-64)                                           | 32 (17-64)                            | 25 (5-49)                                   | 59 (38-109)                        | 87 (49-135)                | <0.001**       |
| 13 | Number of new pediatricians entering the<br>14 workforce each year per 100,000 children<br>15 <18 years in country, <sup>2</sup> median (IQR) | 1.44<br>(0.42-3.07)      | 0.08<br>(0.04-<br>0.14)  | 0.42<br>(0.35-0.79)              | 1.47<br>(1.05-2.67)                                 | 1.44<br>(0.60-3.06)                   | 0.80<br>(0.37-2.19)                         | 5.61<br>(1.66-9.57)                | 3.08<br>(1.86-4.05)        | <0.001**       |
| 16 | Transition from pediatric care†                                                                                                               |                          |                          |                                  |                                                     |                                       |                                             |                                    |                            |                |
| 17 | by age 12 years, no. (%)                                                                                                                      | 3 (3)                    | 1 (4)                    | 0                                | 2 (11)                                              | 0                                     | 0                                           | 0                                  | 0                          | 0.25*          |
| 18 | by age 15 years, no. (%)                                                                                                                      | 47 (39)                  | 16 (70)                  | 6 (75)                           | 8 (44)                                              | 1 (8)                                 | 11 (73)                                     | 0                                  | 5 (12)                     | <0.001*        |
| 19 | by age 18 years, no. (%)                                                                                                                      | 98 (82)                  | 23 (100)                 | 7 (88)                           | 15 (83)                                             | 8 (67)                                | 15 (100)                                    | 2 (67)                             | 29 (71)                    | <0.001*        |
| 20 | by age 21 years, no. (%)                                                                                                                      | 118 (98)                 | 23 (100)                 | 8 (100)                          | 18 (100)                                            | 11 (92)                               | 15 (100)                                    | 2 (67)                             | 41 (100)                   | 0.01*          |
| 21 | Countries reporting regular pediatric<br>22 promotive and preventive care received,<br>23 no. (%)                                             | 110 (91)                 | 19 (83)                  | 7 (88)                           | 19 (100)                                            | 11 (92)                               | 10 (67)                                     | 3 (100)                            | 41 (100)                   | 0.002*         |
| 24 | Percentage of primary care provided by<br>25 non-physician, median (IQR)                                                                      | 28 (9-58)                | 81 (53-85)               | 50 (35-68)                       | 32 (17-61)                                          | 11 (5-27)                             | 9 (17-26)                                   | 30 (12-32)                         | 13 (3-33)                  | <0.001**       |
| 26 | Percentage of primary care provided by<br>27 general physician, family doctor, or<br>28 medical officer, median (IQR)                         | 20<br>(11-36)            | 17<br>(12-25)            | 17<br>(11-38)                    | 18<br>(12-28)                                       | 36<br>(15-46)                         | 21<br>(14-24)                               | 17<br>(17-17)                      | 22<br>(9-49)               | 0.83**         |
| 29 | Percentage of primary care provided by<br>30 pediatrician, median (IQR)                                                                       | 33<br>(13-59)            | 3<br>(2-16)              | 27<br>(20-33)                    | 26<br>(23-55)                                       | 50<br>(46-71)                         | 59<br>(47-69)                               | 51<br>(51-51)                      | 48<br>(26-71)              | <0.001**       |
| 31 | Number of physicians per 100,000<br>32 population, <sup>3</sup> (median, IQR)                                                                 | 158.1 (43.4-<br>290.0)   | 12.0<br>(5.5-37.2)       | 39.2<br>(23.6-64.7)              | 117.9<br>(81.7-116.5)                               | 175 (114.5-<br>257.5)                 | 154.6 (85.4-<br>196.4)                      | 247.7 (207.1-<br>255.4)            | 331.1<br>(277.7-<br>403.5) | <0.001**       |

<sup>1</sup> World Bank list of economies (2017) [Internet]. World Bank. Available from: <http://databank.worldbank.org/data/download/site-content/CLASS.xls>

<sup>2</sup> The State of the World's Children 2016 Statistical Tables. (2016, June 27). Retrieved October 31, 2017, from <https://data.unicef.org/resources/state-worlds-children-2016-statistical-tables/>

<sup>3</sup> The 2016 update, Global Health Workforce Statistics, World Health Organization, Geneva (<http://www.who.int/hrh/statistics/hwfstats/>).

\* *P* values were calculated using Fisher’s exact tests for categorical variables

\*\**P* values were calculated using Kruskal-Wallis tests for continuous variables (based on chi-square statistics with 6 degrees of freedom).

1 † Age of transition from pediatric care not reported by one country in the South and Central America region.

2  
3  
4  
5  
6  
7  
8  
9  
10  
11  
12  
13  
14  
15  
16  
17  
18  
19  
20  
21  
22  
23  
24  
25  
26  
27  
28  
29  
30  
31  
32  
33  
34  
35  
36  
37  
38  
39  
40  
41  
42  
43  
44  
45  
46  
47

Confidential: For Review Only

1  
2  
3  
4  
5  
6  
7  
8  
9  
10  
11  
12  
13  
14  
15  
16  
17  
18  
19  
20  
21  
22  
23  
24  
25  
26  
27  
28  
29  
30  
31  
32  
33  
34  
35  
36  
37  
38  
39  
40  
41  
42  
43  
44  
45  
46  
47  
48  
49  
50  
51  
52  
53  
54  
55  
56  
57  
58  
59  
60

**Figure 1: Pediatrician density per 100,000 children <18 years old\***

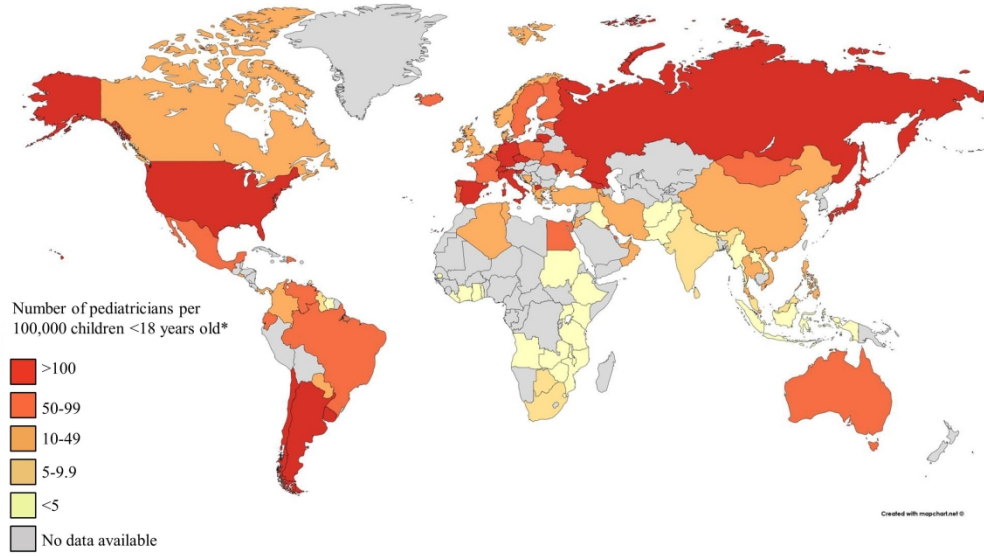

\*Data Source: UNICEF Country Statistics

254x190mm (300 x 300 DPI)



1  
2  
3  
4  
5  
6  
7  
8  
9  
10  
11  
12  
13  
14  
15  
16  
17  
18  
19  
20  
21  
22  
23  
24  
25  
26  
27  
28  
29  
30  
31  
32  
33  
34  
35  
36  
37  
38  
39  
40  
41  
42  
43  
44  
45  
46  
47  
48  
49  
50  
51  
52  
53  
54  
55  
56  
57  
58  
59  
60

**Figure 2: Type of provider seen for Primary Care**

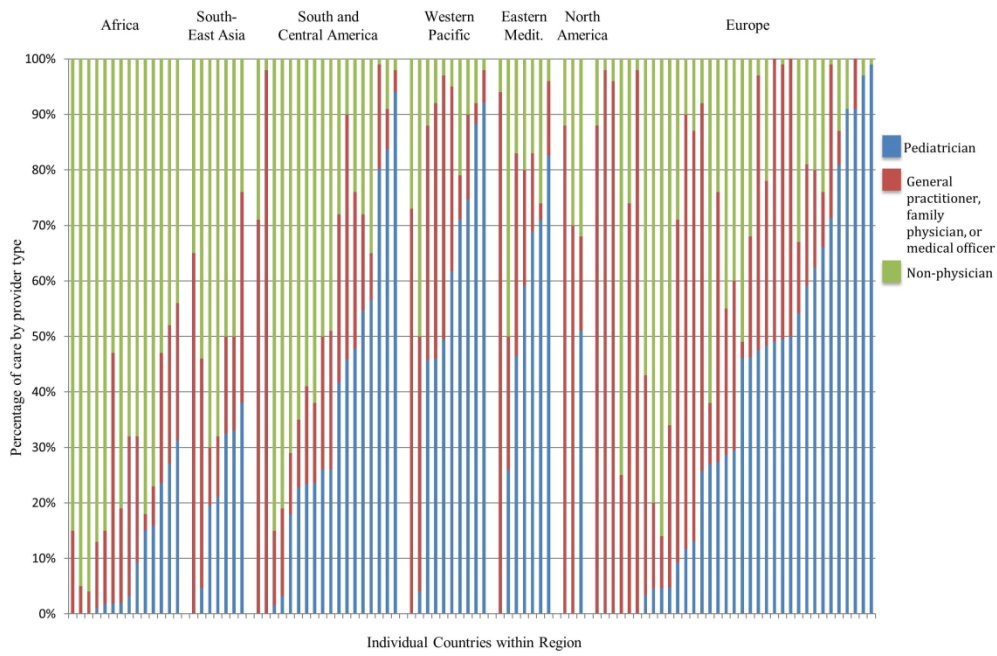

254x190mm (300 x 300 DPI)

# International Pediatrics Survey

Please complete the survey below.

Thank you!

This survey is designed to learn more about how many pediatricians are practicing, who provides medical care for children, and how pediatricians are trained in your country.

Some of the questions ask for specific numbers and may be difficult for you to answer. Please answer to the best of your knowledge. If there is someone who would be better able to answer a question in your country, please tell us their contact information by emailing [beth.harper@childrens.harvard.edu](mailto:beth.harper@childrens.harvard.edu) or in the comment box at the end of the survey. Thankyou!

What language do you prefer for this survey?

English

Country Name

---

Your email address

---

1 **General Practice Information**

2  
3  
4 In [country], is there specific clinical care for  Yes  
5 children, separate from care for adults?  No

6  
7  
8 At approximately what age do children in [country]  < 10 years  
9 transition out of specific pediatric care to adult  10-12 years  
10 care?  13-15 years  
11  16-18 years  
12  19-21 years  
13  >21 years  
14 (Years)

15  
16 Do children in [country] receive regular preventative  Yes  
17 and promotive care throughout childhood (well-child  No  
18 checks, growth monitoring, nutrition assessment,  
19 parenting advice, anticipatory guidance, immunization)  
20 by either a physician or non-physician health care  
21 provider?  
22  
23  
24

25 If a child is receiving regular preventative and Non-physician Non-physician Physician 100% of  
26 promotive care in [country], what type of provider provider 100% of the time provider and Physician 100% of  
27 will he or she see? the time Provider equally the time  
28   
29 (Place a mark on the scale above)

30  
31 If a child is seeing a PHYSICIAN for regular General General  
32 preventative or promotive care in [country], what physician, Family physician, Family  
33 type of physician will he or she most often see? physician, or physician,  
34 Medical officer Medical officer  
35 100% of the time OR Pediatrician Pediatrician 100%  
36 of the time equally of the time  
37 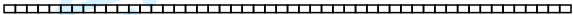  
38 (Place a mark on the scale above)

1 In [country], if you visited the following types of institutions, how likely is it that a Pediatrician  
2 would be working there?  
3

|    |                                |                       |                       |                       |                       |
|----|--------------------------------|-----------------------|-----------------------|-----------------------|-----------------------|
| 4  |                                |                       |                       |                       |                       |
| 5  |                                |                       |                       |                       |                       |
| 6  |                                |                       |                       |                       |                       |
| 7  | General or primary care clinic | <input type="radio"/> | <input type="radio"/> | <input type="radio"/> | <input type="radio"/> |
| 8  | Public or Government-run       | <input type="radio"/> | <input type="radio"/> | <input type="radio"/> | <input type="radio"/> |
| 9  | hospital                       | <input type="radio"/> | <input type="radio"/> | <input type="radio"/> | <input type="radio"/> |
| 10 | Faith-Based hospital           | <input type="radio"/> | <input type="radio"/> | <input type="radio"/> | <input type="radio"/> |
| 11 | Private hospital               | <input type="radio"/> | <input type="radio"/> | <input type="radio"/> | <input type="radio"/> |
| 12 | Academic/referral center       | <input type="radio"/> | <input type="radio"/> | <input type="radio"/> | <input type="radio"/> |
| 13 |                                |                       |                       |                       |                       |
| 14 |                                |                       |                       |                       |                       |
| 15 |                                |                       |                       |                       |                       |
| 16 |                                |                       |                       |                       |                       |
| 17 |                                |                       |                       |                       |                       |
| 18 |                                |                       |                       |                       |                       |
| 19 |                                |                       |                       |                       |                       |
| 20 |                                |                       |                       |                       |                       |
| 21 |                                |                       |                       |                       |                       |
| 22 |                                |                       |                       |                       |                       |
| 23 |                                |                       |                       |                       |                       |
| 24 |                                |                       |                       |                       |                       |
| 25 |                                |                       |                       |                       |                       |
| 26 |                                |                       |                       |                       |                       |
| 27 |                                |                       |                       |                       |                       |
| 28 |                                |                       |                       |                       |                       |
| 29 |                                |                       |                       |                       |                       |
| 30 |                                |                       |                       |                       |                       |
| 31 |                                |                       |                       |                       |                       |
| 32 |                                |                       |                       |                       |                       |
| 33 |                                |                       |                       |                       |                       |
| 34 |                                |                       |                       |                       |                       |
| 35 |                                |                       |                       |                       |                       |
| 36 |                                |                       |                       |                       |                       |
| 37 |                                |                       |                       |                       |                       |
| 38 |                                |                       |                       |                       |                       |
| 39 |                                |                       |                       |                       |                       |
| 40 |                                |                       |                       |                       |                       |
| 41 |                                |                       |                       |                       |                       |
| 42 |                                |                       |                       |                       |                       |
| 43 |                                |                       |                       |                       |                       |
| 44 |                                |                       |                       |                       |                       |
| 45 |                                |                       |                       |                       |                       |
| 46 |                                |                       |                       |                       |                       |
| 47 |                                |                       |                       |                       |                       |
| 48 |                                |                       |                       |                       |                       |
| 49 |                                |                       |                       |                       |                       |
| 50 |                                |                       |                       |                       |                       |
| 51 |                                |                       |                       |                       |                       |
| 52 |                                |                       |                       |                       |                       |
| 53 |                                |                       |                       |                       |                       |
| 54 |                                |                       |                       |                       |                       |
| 55 |                                |                       |                       |                       |                       |
| 56 |                                |                       |                       |                       |                       |
| 57 |                                |                       |                       |                       |                       |
| 58 |                                |                       |                       |                       |                       |
| 59 |                                |                       |                       |                       |                       |
| 60 |                                |                       |                       |                       |                       |

Confidential: For Review Only

**Pediatrics Workforce**

Approximately how many pediatricians (including pediatricians and pediatric sub-specialists) are currently working in [country]?

(If unable to estimate, please leave blank. Please estimate number of persons, even if part-time.)

Please check all of the types of pediatric subspecialty care that are currently available in [country].

- Adolescent Medicine
- Pediatric Allergist
- Pediatric Anesthesiologist
- Pediatric Cardiologist
- Child Development/Developmental Medicine
- Pediatric Dermatologist
- Pediatric Ear, Nose, and Throat surgeon
- Pediatric Endocrinologist
- Pediatric Gastroenterologist
- Geneticist
- Pediatric Hematologist
- Pediatric Immunologist
- Pediatric Infectious Disease
- Pediatric Intensivist (PICU)
- Pediatric Metabolic Disease Specialist
- Pediatric Nephrologist / Renal
- Pediatric Neonatologist (NICU)
- Pediatric Neurologist
- Pediatric Oncologist
- Pediatric Ophthalmologist
- Pediatric Orthopedist
- Pediatric Pulmonologist
- Pediatric Psychiatrist
- Pediatric Rheumatologist
- Pediatric Surgeon
- Pediatric Urologist
- (Please select all that apply)

1 **What percentage of pediatricians working in [country] work in the following areas?**

2

3

|                                         | None                  | < 5%                  | 5-25%                 | 25-50%                | 50-75%                | 75-95%                | >95%                  | 100%                  |
|-----------------------------------------|-----------------------|-----------------------|-----------------------|-----------------------|-----------------------|-----------------------|-----------------------|-----------------------|
| 4 Public Sector only                    | <input type="radio"/> |
| 6 Private Sector only                   | <input type="radio"/> |
| 8 Both in the Public and Private Sector | <input type="radio"/> |

9

10

11

12 Approximately how many NEW pediatricians are entering  
13 the workforce in [country] each year?

(If unable to estimate, please leave blank)

14 Based upon the number of NEW and RETIRING  
15 pediatricians each year in [country], what are  
16 workforce expectations over the next 10 years?

- 17  Increase  
18  Decrease  
19  Stable
- 20
- 21
- 22
- 23
- 24
- 25
- 26
- 27
- 28
- 29
- 30
- 31
- 32
- 33
- 34
- 35
- 36
- 37
- 38
- 39
- 40
- 41
- 42
- 43
- 44
- 45
- 46
- 47
- 48
- 49
- 50
- 51
- 52
- 53
- 54
- 55
- 56
- 57
- 58
- 59
- 60

## Education and Training in Pediatrics

1  
2 Are there post-graduate training programs in  Yes  
3 Pediatrics in [country]?  No  
4

5  
6 How many post-graduate training programs in \_\_\_\_\_  
7 pediatrics are there in [country]?  
8

9  
10 Is there a published directory or list of these  Yes  
11 programs?  No

12  
13 Is this directory or list available on the internet?  Yes No  
14

15 Please list the website or provide a link: \_\_\_\_\_  
16

17  
18 Is there someone we may contact to obtain the  Yes  
19 directory or list?  No  
20

21  
22 Please include the name and contact information  
23 below: \_\_\_\_\_  
24  
25

26 Please list as many of the programs as possible,  
27 along with contact information if available. \_\_\_\_\_  
28  
29

30  
31 Is there a national or regional accreditation  Yes  
32 organization that accredits programs in [country]?  No  
33

34 What is the name of the accrediting organization or \_\_\_\_\_  
35 organizations?  
36

37  
38 Are any of the programs in [country] accredited?  Yes - all Yes -  
39  some No  
40

41  
42 The following questions aim to understand how many years of training it takes to become a pediatrician in [country].  
43

44 Is a university degree required prior to beginning  Yes  
45 medical school?  No  
46  
47  
48  
49  
50  
51  
52  
53  
54  
55  
56  
57  
58  
59  
60

1  
2  
3 How many years of medical school, at a minimum, are  
4 required? \_\_\_\_\_  
5  
6

7 How many years of general medicine training or  
8 internship that is not specific to pediatrics? \_\_\_\_\_  
9

10 How many years of post-graduate training specific to  
11 pediatrics? \_\_\_\_\_  
12

13 Is additional supervised time in practice required to  
14 register as a specialist?  Yes  
15  No  
16

17 How many years of additional supervised practice is  
18 required to register as a specialist? \_\_\_\_\_  
19  
20

21 In [country], are there national standardized  
22 guidelines/requirements for postgraduate pediatric  
23 training?  Yes  
24  No

25 Is there a standardized curriculum (i.e., national  
26 curriculum) in place for pediatric post-graduate  
27 training programs?  Yes  
28  No

29 What body is in charge of the standardized (i.e.  
30 national) curriculum? \_\_\_\_\_  
31

32 Is there a published resource of post-graduate  
33 training program requirements?  Yes  
34  No

35 Please include a link to the website for this  
36 resource or contact information  
37 \_\_\_\_\_  
38  
39

40 Are there pediatric sub-specialty training  
41 opportunities in your country?  Yes  
42  No

(We define sub-specialty training as training  
43 within a particular field of pediatrics, for  
44 example pediatric endocrinology or pediatric  
45 cardiology)  
46  
47  
48  
49  
50  
51  
52  
53  
54  
55  
56  
57  
58  
59  
60



1  
2  
3  
4  
5  
6  
7  
8  
9  
10  
11  
12  
13  
14  
15  
16  
17  
18  
19  
20  
21  
22  
23  
24  
25  
26  
27  
28  
29  
30  
31  
32  
33  
34  
35  
36  
37  
38  
39  
40  
41  
42  
43  
44  
45  
46  
47  
48  
49  
50  
51  
52  
53  
54  
55  
56  
57  
58  
59  
60

Please check all of the pediatric sub-specialties for which there are training programs in [country].

- Adolescent Medicine
  - Pediatric Allergist Pediatric
  - Anesthesiologist Pediatric
  - Cardiologist
  - Child Development/Developmental Medicine
  - Pediatric Dermatologist
  - Pediatric Ear, Nose, and Throat surgeon
  - Pediatric Endocrinologist
  - Pediatric Gastroenterologist
  - Geneticist
  - Pediatric Hematologist Pediatric
  - Immunologist Pediatric
  - Infectious Disease Pediatric
  - Intensivist (PICU) Metabolic
  - Disease Specialist Pediatric
  - Nephrologist / Renal
  - Neonatologist (NICU) Pediatric
  - Neurologist Pediatric Oncologist
  - Pediatric Ophthalmologist
  - Pediatric Orthopedist
  - Pediatric Pulmonologist
  - Pediatric Psychiatrist
  - Pediatric Rheumatologist
  - Pediatric Surgeon Pediatric
  - Urologist
- (Select all that apply)

Confidential: For Review Only

1  
2  
3  
4  
5  
6  
7  
8  
9  
10  
11  
12  
13  
14  
15  
16  
17  
18  
19  
20  
21  
22  
23  
24  
25  
26  
27  
28  
29  
30  
31  
32  
33  
34  
35  
36  
37  
38  
39  
40  
41  
42  
43  
44  
45  
46  
47  
48  
49  
50  
51  
52  
53  
54  
55  
56  
57  
58  
59  
60

---

---

We greatly appreciate any additional information, clarifications, or comments you may have! Please tell us about them here.

---

THANK YOU for your participation! You will receive a copy of the report when available. If you have additional questions or concerns, please enter them below or email us at [beth.harper@childrens.harvard.edu](mailto:beth.harper@childrens.harvard.edu)

Confidential: For Review Only

### Supplemental File - List of Country Respondents by Region<sup>1</sup>

| <i>Africa</i>    |                      |                              |
|------------------|----------------------|------------------------------|
| <i>Responder</i> | <i>Non-responder</i> | <i>No Contact Identified</i> |
| Algeria          | Benin                | Cabo Verde                   |
| Angola           | Burkina Faso         | Central African Republic     |
| Botswana         | Burundi              | Comoros                      |
| Congo, Dem. Rep. | Cameroon             | Equatorial Guinea            |
| Côte d'Ivoire    | Chad                 | Guinea                       |
| Ethiopia         | Congo, Rep.          | São Tomé and Príncipe        |
| Gambia, The      | Eritrea              | South Sudan                  |
| Ghana            | Gabon                |                              |
| Kenya            | Guinea-Bissau        |                              |
| Liberia          | Lesotho              |                              |
| Malawi           | Madagascar           |                              |
| Mozambique       | Mali                 |                              |
| Namibia          | Mauritania           |                              |
| Nigeria          | Mauritius            |                              |
| Rwanda           | Niger                |                              |
| Seychelles       | Senegal              |                              |
| South Africa     | Sierra Leone         |                              |
| Swaziland        |                      |                              |
| Tanzania         |                      |                              |
| Togo             |                      |                              |
| Uganda           |                      |                              |
| Zambia           |                      |                              |
| Zimbabwe         |                      |                              |

<sup>1</sup> Regions defined using World Health Organization regional groupings with North America separated from Central and South America. Further information about WHO regional groupings can be found at: [https://www.who.int/healthinfo/global\\_burden\\_disease/definition\\_regions/en/](https://www.who.int/healthinfo/global_burden_disease/definition_regions/en/) (Accessed December 2018).

*Eastern Mediterranean*

| <i>Responder</i>     | <i>Non-responder</i> | <i>No Contact Identified</i> |
|----------------------|----------------------|------------------------------|
| Afghanistan          | Djibouti             |                              |
| Bahrain              | Lebanon              |                              |
| Egypt, Arab Rep.     | Morocco              |                              |
| Iran, Islamic Rep.   | Saudi Arabia         |                              |
| Iraq                 | Somalia              |                              |
| Jordan               | Yemen, Rep.          |                              |
| Kuwait               |                      |                              |
| Libya                |                      |                              |
| Oman                 |                      |                              |
| Pakistan             |                      |                              |
| Qatar                |                      |                              |
| Sudan                |                      |                              |
| Syrian Arab Republic |                      |                              |
| Tunisia              |                      |                              |
| United Arab Emirates |                      |                              |

*Europe*

| <i>Responder</i>       | <i>Non-responder</i> | <i>No Contact Identified</i> |
|------------------------|----------------------|------------------------------|
| Albania                | Croatia              | Andorra                      |
| Armenia                | Cyprus               | Azerbaijan                   |
| Austria                | Kazakhstan           | Kosovo                       |
| Belarus                | Kyrgyz Republic      | Montenegro                   |
| Belgium                | Malta                | San Marino                   |
| Bosnia and Herzegovina | Netherlands          | Turkmenistan                 |
| Bulgaria               | Tajikistan           |                              |
| Czech Republic         | Uzbekistan           |                              |
| Denmark                |                      |                              |
| Estonia                |                      |                              |
| Finland                |                      |                              |
| France                 |                      |                              |
| Georgia                |                      |                              |
| Germany                |                      |                              |
| Greece                 |                      |                              |
| Hungary                |                      |                              |
| Iceland                |                      |                              |
| Ireland                |                      |                              |
| Israel                 |                      |                              |
| Italy                  |                      |                              |
| Latvia                 |                      |                              |
| Liechtenstein          |                      |                              |
| Lithuania              |                      |                              |
| Luxembourg             |                      |                              |
| Macedonia, FYR         |                      |                              |
| Moldova                |                      |                              |
| Norway                 |                      |                              |
| Palestine              |                      |                              |
| Poland                 |                      |                              |
| Portugal               |                      |                              |
| Romania                |                      |                              |
| Russian Federation     |                      |                              |
| Serbia                 |                      |                              |
| Slovak Republic        |                      |                              |
| Slovenia               |                      |                              |
| Spain                  |                      |                              |
| Sweden                 |                      |                              |
| Switzerland            |                      |                              |
| Turkey                 |                      |                              |
| Ukraine                |                      |                              |
| United Kingdom         |                      |                              |

*North America*

| <i>Responder</i> | <i>Non-responder</i> | <i>No Contact Identified</i> |
|------------------|----------------------|------------------------------|
| Canada           | Puerto Rico          |                              |
| Mexico           |                      |                              |
| United States    |                      |                              |

Confidential: For Review Only

1  
2  
3  
4  
5  
6  
7  
8  
9  
10  
11  
12  
13  
14  
15  
16  
17  
18  
19  
20  
21  
22  
23  
24  
25  
26  
27  
28  
29  
30  
31  
32  
33  
34  
35  
36  
37  
38  
39  
40  
41  
42  
43  
44  
45  
46  
47  
48  
49  
50  
51  
52  
53  
54  
55  
56  
57  
58  
59  
60

| <i>South and Central America</i> |                      |                                |
|----------------------------------|----------------------|--------------------------------|
| <i>Responder</i>                 | <i>Non-responder</i> | <i>No Contact Identified</i>   |
| Argentina                        | Bahamas, The         | Antigua and Barbuda            |
| Bolivia                          | Belize               | Barbados                       |
| Brazil                           | Costa Rica           | St. Kitts and Nevis            |
| Chile                            | Cuba                 | St. Lucia                      |
| Colombia                         | Dominica             | St. Vincent and the Grenadines |
| Dominican Republic               | Honduras             |                                |
| Ecuador                          | Jamaica              |                                |
| El Salvador                      | Uruguay              |                                |
| Grenada                          |                      |                                |
| Guatemala                        |                      |                                |
| Guyana                           |                      |                                |
| Haiti                            |                      |                                |
| Nicaragua                        |                      |                                |
| Panama                           |                      |                                |
| Paraguay                         |                      |                                |
| Peru                             |                      |                                |
| Suriname                         |                      |                                |
| Trinidad and Tobago              |                      |                                |
| Venezuela, RB                    |                      |                                |

*South-East Asia*

| <i>Responder</i> | <i>Non-responder</i> | <i>No Contact Identified</i> |
|------------------|----------------------|------------------------------|
| Bangladesh       | Maldives             | Timor-Leste                  |
| Bhutan           |                      |                              |
| India            |                      |                              |
| Indonesia        |                      |                              |
| Myanmar          |                      |                              |
| Nepal            |                      |                              |
| Sri Lanka        |                      |                              |
| Thailand         |                      |                              |



*Western Pacific*

| <i>Responder</i>     | <i>Non-responder</i> | <i>No Contact Identified</i> |
|----------------------|----------------------|------------------------------|
| Australia            | Korea, Rep.          | Brunei Darussalam            |
| Cambodia             | Macao SAR, China     | Fiji                         |
| China                | Malaysia             | Kiribati                     |
| Hong Kong SAR, China | Papua New Guinea     | Korea, Dem. People's Rep.    |
| Japan                |                      | Marshall Islands             |
| Lao PDR              |                      | Micronesia, Fed. Sts.        |
| Mongolia             |                      | Nauru                        |
| New Zealand          |                      | Palau                        |
| Philippines          |                      | Samoa                        |
| Singapore            |                      | Solomon Islands              |
| Taiwan, China        |                      | Tonga                        |
| Vietnam              |                      | Tuvalu                       |
|                      |                      | Vanuatu                      |

# BMJ Paediatrics Open

## Where are the Paediatricians? An International Survey to Understand the Global Paediatric Workforce

|                               |                                                                                                                                                                                                                                                                                                                                                                                |
|-------------------------------|--------------------------------------------------------------------------------------------------------------------------------------------------------------------------------------------------------------------------------------------------------------------------------------------------------------------------------------------------------------------------------|
| Journal:                      | <i>BMJ Paediatrics Open</i>                                                                                                                                                                                                                                                                                                                                                    |
| Manuscript ID                 | bmjpo-2018-000397.R2                                                                                                                                                                                                                                                                                                                                                           |
| Article Type:                 | Original article                                                                                                                                                                                                                                                                                                                                                               |
| Date Submitted by the Author: | 23-Dec-2018                                                                                                                                                                                                                                                                                                                                                                    |
| Complete List of Authors:     | HARPER, BETH; Boston Children's Hospital, Nganga, Waceke; Aga Khan University - Kenya<br>Armstrong, Robert; Aga Khan University - Kenya<br>Forsyth, Kevin; Flinders University Faculty of Medicine Nursing and Health Sciences<br>Ham, Hazen; Global Pediatric Education Consortium<br>Keenan, William; Saint Louis University<br>Russ, Christiana; Children's Hospital Boston |
| Keywords:                     | Paediatric Staffing, Health Service                                                                                                                                                                                                                                                                                                                                            |
|                               |                                                                                                                                                                                                                                                                                                                                                                                |

SCHOLARONE™  
Manuscripts

## Where are the Paediatricians? An International Survey to Understand the Global Paediatric Workforce

Beth D. Harper,<sup>1</sup> Waceke Nganga,<sup>2</sup> Robert Armstrong,<sup>2</sup> Kevin D. Forsyth,<sup>3</sup> Hazen P. Ham,<sup>4</sup> William J. Keenan,<sup>5</sup> Christiana M. Russ<sup>1</sup>

**Affiliations:** <sup>1</sup>Boston Children's Hospital, Boston, USA; <sup>2</sup>Aga Khan University, Nairobi, Kenya; <sup>3</sup>Flinders University, Australia; <sup>4</sup>Global Pediatric Education Consortium, Chapel Hill, USA; <sup>5</sup>Saint Louis University, St. Louis, USA

**Address correspondence to:** Beth D. Harper, Department of Pediatrics, Boston Children's Hospital, 300 Longwood Ave, Boston MA 02115, [beth.harper@childrens.harvard.edu](mailto:beth.harper@childrens.harvard.edu), 617-355-6000

**Funding Source:** This research received no specific grant from any funding agency in the public, commercial or not-for-profit sectors.

**Financial Disclosure:** All authors have no financial relationships relevant to this article to disclose.

**Potential Conflicts of Interest:** The authors have no conflicts of interest relevant to this article to disclose.

### Abbreviations:

Sustainable Development Goals – SDGs

Gross Domestic Product – GDP

Interquartile Range – IQR

International Pediatric Association - IPA

### Contributors' Statement Page

Dr. Harper and Dr. Russ conceptualized and designed the study, designed the data collection instruments, coordinated and supervised data collection, drafted the initial manuscript, and reviewed and revised the manuscript.

Dr. Nganga, Dr. Armstrong, Dr. Forsyth coordinated data collection, reviewed and revised the manuscript.

Dr. Ham assisted with design of the data collection instrument including piloting, and reviewed and revised the manuscript.

Dr. Keenan advised the international approach, aided with data collection, reviewed and revised the manuscript.

All authors approved the final manuscript as submitted and agree to be accountable for all aspects of the work.

## Abstract

**Objective:** Our primary objective was to examine the global paediatric workforce and to better understand geographic differences in the number of paediatricians globally. Secondary objectives were to describe paediatric workforce expectations, who provides children with preventative care, and when children transition out of paediatric care.

**Design:** Survey of identified paediatric leaders in each country.

**Setting:** Paediatric association leaders worldwide

**Main outcome measures:** Paediatrician numbers, provision of primary care for children, age of transition to adult care.

**Results:** Responses were obtained from 121 countries (73% of countries approached). The number of paediatricians per 100,000 children ranged from a median of 0.5 (IQR 0.3-1.4) in low income countries to 72 (IQR 4-118) in high income countries. Africa and South-East Asia reported the lowest paediatrician density (median of 0.8 paediatricians per 100,000 children, IQR 0.4-2.6 and median of 4, IQR 3-9, respectively), and fewest paediatricians entering the workforce. 82% of countries reported transition to adult care by age 18 and 39% by age 15. Most countries (91%) but only 64% of low income countries reported provision of paediatric preventative care ( $p < 0.001$ , Cochran-Armitage trend test). Systems of primary care provision varied widely. A majority of countries (63%) anticipated increases in their paediatric workforce in the next decade.

**Conclusions:** Paediatrician density mirrors known inequities in health provider distribution. Fewer paediatricians are entering the workforce in areas with already low paediatrician density, which may exacerbate disparities in child health outcomes. In some regions, children transition to adult care during adolescence, with implications for health care training and delivery. Paediatrician roles are heterogeneous worldwide, and country-specific strategies should be utilized to address inequity in child health provision.

**What is Known about This Subject:**

Significant discrepancy between burden of disease and distribution of health professionals has been documented.

Various structures are in place for paediatric care across the globe.

The global distribution of pediatricians, their role in providing care to children and the structure for child health systems in various countries are not known.

**What This Study Adds:**

There are inequities in both paediatrician distribution and numbers of new paediatricians entering the workforce in areas with high child mortality.

Most countries provide some regular primary care for children, but the systems to provide that care are highly variable.

In many areas, children transition from paediatric care in early adolescence, with implications for training and care delivery.

## Introduction

The discrepancy between the global burden of disease and the distribution of health professionals has been well-described.(1-9) Areas with the highest disease burden have the lowest percentage of health professionals, exacerbating the impact of the health workforce deficit. The World Health Organization has identified an index of 4.45 health workers (physicians, nurses, and midwives) per 1000 population necessary to meet the Sustainable Development Goals (SDGs) by 2030.(6) Countries are called on to set specific targets for numbers of health workers including physicians and health specialists depending upon their needs and health services structure.

Child health was a focal point in the Millennium Development Goals and continues to be important in the SDGs. Epidemiologic shifts towards non-communicable diseases, a renewed focus on optimizing child development, the unique health needs of adolescents, and emphasis on reducing morbidity not just mortality, all require renewed deliberation about how health care for children is delivered and advanced.(10-12) Differing health system designs lead to wide variability in the roles that paediatricians and other child health providers fill in supporting the health of a country's children. Understanding those roles is vital to providing equitable and quality health care and to developing appropriate training competencies for all child health professionals.

Some regional efforts have been undertaken to understand where paediatricians are working and what roles they play, but the paediatric workforce worldwide has not been previously described.(6, 13-15) Similarly, while health systems have been described on country and sometimes regional levels, a global understanding of health care systems for children and their variation can provide valuable information for potential reforms at country level.

1  
2  
3 The goal of this study was to examine the global status of the paediatric workforce and to  
4 better understand geographic differences in the types of work that paediatricians undertake in the  
5 provision of child health care. Our objectives were to identify the number of paediatricians  
6 globally, examine paediatric workforce expectations, understand who provides children with  
7 regular promotive and preventative care, and to learn when children transition out of paediatric  
8 care to adult care.  
9  
10  
11  
12  
13  
14  
15  
16  
17  
18

## 19 **Methods**

### 20 *Survey development*

21  
22  
23 An online survey was developed using REDCap, an electronic survey tool.(16) The  
24 survey queried the number of paediatricians per country, expected workforce changes, primary  
25 care provision for children, and age of transition to adult care. (Supplement 1) Faculty at Boston  
26 Children's Hospital initially piloted the survey with cognitive interviewing to improve question  
27 clarity. The refined survey was further piloted and edited with paediatric leaders within the  
28 Global Paediatric Education Consortium representing Europe, Asia, Africa, and the Middle  
29 East.(17) As the internationally agreed upon languages for communication between paediatric  
30 societies in the International Paediatric Association (IPA) are English, French and Spanish, the  
31 final survey was translated into French and Spanish by DR Interpreting, Inc. Translated surveys  
32 were sent to native French and Spanish speakers to confirm accuracy of the translation.  
33  
34  
35  
36  
37  
38  
39  
40  
41  
42  
43  
44  
45  
46  
47  
48

### 49 *Patient and public involvement*

50  
51  
52 Patients and the public were not directly involved in the design of this study.  
53  
54  
55  
56  
57  
58  
59  
60

### *Study Sample*

The survey was distributed to identified paediatric leaders with a goal of attaining one response per country or economy. Countries and economies for inclusion were defined as the 193 UN member countries plus the 5 World Bank Economies (Hong Kong, Macau, Palestine, Puerto Rico and Taiwan) with populations of over 500,000 people, for a total of 198 countries and economies. The survey was initially distributed in May 2015 via email to the lead delegates from the 121 countries with active membership in the IPA at that time. Regional and subspecialty societies that did not function at the country level were excluded. The survey was sent to non-respondents each week for three consecutive weeks. In a second phase, contact was made with paediatric leaders within the non-responding countries, as well as an additional 45 countries in which paediatric leadership was identified through contacts known to the author group, networks from the Global Paediatric Education Consortium, International Paediatric Academic Leaders Association, Harvard University, the American Academy of Paediatrics Section of International Child Health, or through contacts with country Ministries of Health. Paediatric leaders from non-responding countries who were in attendance at the International Paediatric Congress in August 2016 were also identified and approached.

A majority of countries (73) had a single response. Of those countries with duplicate responses to the survey, 30 had only one complete response and 17 required further review by the authors (BH and CR). Of those, seven countries had identical duplicate responses, or the response that was most complete was selected. Ten countries were contacted to clarify duplicate responses, and 9 clarified. One country had two responses with some variation, and the respondents could not be reached for clarification; for that country the response from the president of the country's paediatric association was used.



1  
2  
3 Country statistics for populations under age 18 were obtained from publically available  
4 UNICEF country statistics.(18) Income and GDP classifications were based on 2016 World  
5  
6 Bank groupings.  
7  
8

### 9 10 *Statistical Analysis*

11  
12  
13  
14 Paediatric workforce characteristics were described using frequencies, medians and  
15 interquartile ranges where appropriate. Comparisons between regions were calculated using  
16  
17 Kruskal-Wallis tests and Fisher's exact tests, while comparisons between GDP categories were  
18  
19 calculated using Cuzick's non-parametric tests for trend and Cochran-Armitage trend tests. Data  
20  
21 was analyzed using Stata (StataCorp. 2015. *Stata Statistical Software: Release 14*. College  
22  
23 Station, TX: StataCorp LP).  
24  
25  
26

27  
28  
29 The study protocol was reviewed by the Institutional Review Board at Boston Children's  
30  
31 Hospital and deemed not human subjects research.  
32  
33

### 34 **Results**

35  
36  
37 Responses were received from 95 (79%) of the 121 countries with IPA membership, and  
38  
39 121 (73%) of the 166 total countries and economies for which a contact was identified.  
40  
41 (Supplement 2). In total, this represented 61% of the global 198 countries and economies. Eight  
42  
43 countries responded in French, ten in Spanish, and the remainder in English.  
44  
45  
46

47  
48 There were 32 countries for whom no contact was identified and therefore no survey sent,  
49  
50 and 45 countries that did not respond to the survey (Table 1). No contact identified and non-  
51  
52 responder countries did not vary significantly from responder countries by GDP ( $p=0.18$ ,  
53  
54 Fisher's exact test), but did vary by region ( $p=0.002$ , Fisher's exact test), with more no contact  
55  
56  
57  
58  
59  
60

1  
2  
3 identified countries located in the Western Pacific, and more non-responders in Africa. Countries  
4 with no contact identified had significantly smaller populations than those targeted, with a  
5 median population of 274,000 as compared with a median population of 10 million in responder  
6 countries ( $p < 0.001$ , Kruskal-Wallis test).  
7  
8  
9  
10  
11  
12

13 The number of paediatricians reported was normalized against the population of children  
14 under 18 years old in each country to obtain a paediatrician density ratio (Figure 1).  
15 Paediatrician density varied significantly by GDP, ranging from a median of 0.5 paediatricians  
16 per 100,000 children in low income countries to a median of 72 paediatricians per 100,000  
17 children in high income countries ( $p < 0.001$ , Nonparametric trend test, Table 2). In addition,  
18 significant variability was seen by region ( $p < 0.001$ , Kruskal-Wallis test, Table 3). The lowest  
19 density was seen in Africa (median of 0.8 paediatricians per 100,000 children, interquartile range  
20 (IQR) 0.4-2.6) and South-East Asia (median of 4 paediatricians per 100,000 children, IQR 3-9)  
21 as compared with a global median of 32 paediatricians per 100,000 children (IQR 5-74 and 59  
22 and 87 per 100,000 children (IQR 38 109, and 49-135) in North America and Europe,  
23 respectively.  
24  
25  
26  
27  
28  
29  
30  
31  
32  
33  
34  
35  
36  
37  
38

39 The number of new paediatricians entering the workforce also varied by GDP  
40 classification ( $p = 0.01$ , Nonparametric trend test) and by region ( $p < 0.001$ , Kruskal-Wallis test).  
41 In low income countries, the paediatric workforce gained a median of 10 new paediatricians per  
42 year, or 0.08 per 100,000 children, while in high income countries the median was 60 new  
43 paediatricians per year, or 3 per 100,000 children (Table 2). In Africa, countries anticipated a  
44 median of 5 new paediatricians (0.08 per 100,000 children) per year as compared to a global  
45 median of 30 (1.44 paediatricians per 100,000 children) (Table 3).  
46  
47  
48  
49  
50  
51  
52  
53  
54  
55  
56  
57  
58  
59  
60

1  
2  
3 Age of transition out of paediatric care did not vary by gross domestic product (GDP,  
4 Table 2) but did vary by region ( $p < 0.001$ , Fisher's exact test, Table 3). Notably, in South-East  
5 Asia, Africa, and the Eastern Mediterranean, over 65% of countries reported that children  
6 transitioned from paediatric care by age 15 years, whereas less than 45% of countries reported  
7 transition by age 15 in South and Central America and less than 15% in Europe, North America,  
8 and the Western Pacific.  
9

10  
11  
12 Most countries (91%) responded affirmatively when asked "*do children in your country*  
13 *receive regular preventative and promotive care throughout childhood (well-child checks,*  
14 *growth monitoring, nutrition assessment, parenting advice, anticipatory guidance,*  
15 *immunization) by either a physician or non-physician health care provider?"* This rate was  
16 considerably lower in low-income countries, where only 64% of countries reported regular  
17 primary care ( $p < 0.001$ , Cochran-Armitage trend test, Table 2). The type of provider seen for  
18 primary paediatric care varied (Figure 2). Worldwide, children see non-physicians as the  
19 primary care provider a median of 28% of the time (Table 2, Table 3, IQR 9-59%). If children  
20 saw a physician, that person was a paediatrician (rather than general physician, family physician  
21 or medical officer) a median of 33% of the time.  
22  
23  
24  
25  
26  
27  
28  
29  
30  
31  
32  
33  
34  
35  
36  
37  
38  
39  
40

## 41 Discussion

42  
43  
44  
45 This international survey of paediatricians is the first, to our knowledge, to report data on  
46 paediatrician density and the roles that paediatricians play in provision of care for children on a  
47 global scale. This study identified wide variability in paediatrician density, consistent with health  
48 workforce findings of physicians as a whole.(5, 8, 19) Areas with the highest burden of  
49 paediatric mortality and morbidity had the lowest paediatrician density, and paediatricians are  
50  
51  
52  
53  
54  
55  
56  
57  
58  
59  
60

1  
2  
3 joining the workforce at lower rates in those same regions, which may exacerbate inequities in  
4  
5 child health. One reason for this inequity may be the existence of a training capacity gap, with  
6  
7 fewer avenues to train paediatricians or fewer opportunities for employment in areas with an  
8  
9 already low workforce. Some high-income countries have already undertaken more detailed  
10  
11 analysis of their paediatric workforce, and used this to inform investment and education  
12  
13 policy.(14, 20-24)  
14  
15  
16  
17

18 Another explanation could be the impact of internal or external migration on access to  
19  
20 paediatric care. Both have multiple drivers, including job satisfaction, healthy work  
21  
22 environment, adequate supplies, feeling of support, and appropriate recognition.(2, 25, 26)  
23  
24 Within countries, there is often a significant misdistribution of health care professionals towards  
25  
26 large, wealthy urban areas.(1, 2, 25, 27) More detailed data on intra-national distribution of  
27  
28 paediatricians would be valuable in understanding and seeking to address these disparities of  
29  
30 access. Migration between countries has also been well documented.(1, 2, 8, 26) While there are  
31  
32 no clear data on the impact of this ‘brain drain’ in paediatrics, in both the United States and UK,  
33  
34 it is estimated that one-third of the paediatrician workforce are international medical  
35  
36 graduates.(28, 29) Specific efforts to reverse these trends include a focus on providing access to  
37  
38 medical training to students from low resource settings, as exemplified by the Latin American  
39  
40 School of Medicine (ELAM) in Cuba, and efforts to develop pediatric residency programs in low  
41  
42 and middle income countries.(30, 31) Additional efforts to improve salaries, work environments  
43  
44 and career opportunities may also be effective means of decreasing external migration and  
45  
46 encouraging a trend towards a more equitable distribution of paediatricians globally.(32-34)  
47  
48  
49  
50  
51  
52

53 This study identified that many children transition from paediatric care to adult care by  
54  
55 age 15, relatively early in adolescence. Age of transition varied by region but not by country  
56  
57  
58  
59  
60

1  
2  
3 income, suggesting that it may be more associated with cultural or professional norms around  
4 transition to adulthood rather than workforce planning. Improved understanding of the systems  
5 of care for adolescents is critical among UN, WHO and Lancet Commission calls for increased  
6 focus, expertise and research on adolescent-specific care.(10-12) With early transition to adult  
7 care, advancing the adolescent health agenda may require a defined framework for adolescent  
8 services and multisectoral approach that engages youth within their communities.  
9  
10  
11  
12  
13  
14  
15  
16  
17

18 Our study demonstrated that while most countries offered some form of broadly defined  
19 preventive care to children, this primary care role is often filled by non-physicians or generalists.  
20 In both high and low income countries, task shifting and task sharing have been important and  
21 often successful methods for improving access to care and addressing health costs while  
22 retaining quality of care.(35-39) Most countries continue to explore the appropriate skills mix for  
23 providing care, particularly in community settings. Optimizing this skills mix will require inter-  
24 professional collaboration and training to promote successful multidisciplinary primary care.  
25 System planning needs to account for and support the primary role of family and the informal  
26 care structures that may exist in communities. A thoughtful country-level approach is required to  
27 balance development of preventive and community interventions, alongside secondary and  
28 tertiary level services with appropriate referral structures.  
29  
30  
31  
32  
33  
34  
35  
36  
37  
38  
39  
40  
41  
42  
43  
44

45 Workforce studies, including this one, may not capture all of the specific roles that health  
46 professionals play, including leadership in health care systems, policy, and government;  
47 educators and researchers in universities; and community advocates. A robust national workforce  
48 strategy needs to account for these roles, and country-level human resources for health planning  
49 should establish a target density for the paediatrician workforce in relation to their expected roles  
50  
51  
52  
53  
54  
55  
56  
57  
58  
59  
60

1  
2  
3 within the system. For example, the role of a paediatrician in even high density, high-income  
4 countries such as the US, UK and Australia is by design quite different, with paediatricians  
5 providing primary care in the former, and secondary and tertiary care in the latter. Clear  
6 understanding and designation of tasks such as provision of primary care and age of transition to  
7 adult care would need to be considered in order to appropriately define paediatric workforce  
8 requirements. Analysis of skills mix needs should also incorporate anticipated epidemiologic  
9 changes including a reduction in infectious causes of under-5 mortality, an increase in the  
10 proportion of neonatal mortality, and a shift towards chronic diseases in children.(12, 40) As  
11 countries work to scale-up their health care workforce these baseline data can help inform  
12 development strategies.(41, 42)

13  
14  
15  
16  
17  
18  
19  
20  
21  
22  
23  
24  
25  
26  
27 This study has several limitations. We found no validated tool that would appropriately  
28 meet our study objective, therefore developed the survey de novo. Despite piloting the survey  
29 among multiple countries, cultures, and languages, it is possible that some terms, while  
30 commonly used, may have been interpreted differently in different settings, particularly among  
31 respondents for whom French, English or Spanish was not their native language. All data were  
32 collected as survey responses, usually from a single representative in each country. While we  
33 targeted experts at the national paediatric association level who would have knowledge of the  
34 state of paediatrics and child health in that nation, responses could vary among individuals  
35 particularly for more subjective questions. While we achieved a high level of response globally,  
36 there were regional gaps, with particular low responses from West Africa and the Western  
37 Pacific. Countries with low physician density and population were similarly underrepresented in  
38 this sample. These challenges may have been due to language or internet access difficulties,  
39 absence of or less active national paediatric organization or simply limited paediatric presence in  
40  
41  
42  
43  
44  
45  
46  
47  
48  
49  
50  
51  
52  
53  
54  
55  
56  
57  
58  
59  
60

1  
2  
3 those countries. This study was focused on paediatricians, a small component in any country of  
4  
5 the human workforce related to child health and health systems. However, paediatricians are  
6  
7 important resources for countries, with substantial understanding of child health needs who can  
8  
9 also help support country development of child health services and provide guidance for the  
10  
11 continuum of care for children and families.  
12  
13

## 14 15 **Conclusion**

16  
17  
18 As the global community seeks universal health coverage and works to address the  
19  
20 known shortage in healthcare workers, care should be taken to meet the health workforce needs  
21  
22 of the world's children and adolescents. Clarification of paediatrician roles and accompanying  
23  
24 skill mix is important in developing health workforce capacity to meet those needs. This study  
25  
26 described the state of the paediatric workforce worldwide with notable variability in  
27  
28 paediatrician density and roles in different countries. A training capacity gap in countries with  
29  
30 high disease burdens may exacerbate the problem of a small workforce relative to healthcare  
31  
32 needs. These findings highlight the need for country specific child health workforce strategies,  
33  
34 assisted by the development of standardized tools to monitor health care capacity and outcomes  
35  
36 as countries focus on meeting the SDGs for child health.  
37  
38  
39  
40  
41  
42  
43  
44  
45  
46  
47  
48  
49  
50  
51  
52  
53  
54  
55  
56  
57  
58  
59  
60

### Acknowledgements

The authors wish to thank Edgar Vesga for his assistance with survey implementation, members of the Global Pediatric Education Consortium who piloted the survey, Julie Hurlbut for assistance with data analysis, tables and figures, Lisa Asaro and David Wypij for assistance with statistical analysis, and Judith Palfrey for editing.

Confidential: For Review Only



## References

1. Chen C, Buch E, Wassermann T, Frehywot S, Mullan F, Omaswa F, et al. A survey of Sub-Saharan African medical schools. *Hum Resour Health*. 2012;10:4.
2. Kasper J, Bajunirwe F. Brain drain in sub-Saharan Africa: contributing factors, potential remedies and the role of academic medical centres. *Archives of disease in childhood*. 2012;97(11):973-9.
3. Liu JX, Goryakin Y, Maeda A, Bruckner T, Scheffler R. Global Health Workforce Labor Market Projections for 2030. *Hum Resour Health*. 2017;15(1):11.
4. Baker T. Pediatric emergency and critical care in low-income countries. *Paediatric anaesthesia*. 2009;19(1):23-7.
5. Shehu BB, Ameh EA. Poverty and disease burden vs medical education in sub-Saharan Africa. *Annals of African medicine*. 2007;6(4):139-41.
6. WHO. Health workforce Requirements for Universal health coverage and the sustainable development goals. . *Human Resources for Health Observer Series* 2016;17.
7. Pozo-Martin F, Nove A, Lopes SC, Campbell J, Buchan J, Dussault G, et al. Health workforce metrics pre- and post-2015: a stimulus to public policy and planning. *Hum Resour Health*. 2017;15(1):14.
8. Crisp N, Chen L. Global supply of health professionals. *The New England journal of medicine*. 2014;370(10):950-7.
9. Frenk J, Chen L, Bhutta ZA, Cohen J, Crisp N, Evans T, et al. Health professionals for a new century: transforming education to strengthen health systems in an interdependent world. *Lancet (London, England)*. 2010;376(9756):1923-58.
10. Patton GC, Sawyer SM, Santelli JS, Ross DA, Afifi R, Allen NB, et al. Our future: a Lancet commission on adolescent health and wellbeing. *Lancet (London, England)*. 2016;387(10036):2423-78.
11. Every Woman Every Child: The Global Strategy for Women's, Children's and Adolescents' Health (2016-2030). 2016.
12. Kyu HH, Pinho C, Wagner JA, Brown JC, Bertozzi-Villa A, Charlson FJ, et al. Global and National Burden of Diseases and Injuries Among Children and Adolescents Between 1990 and 2013: Findings From the Global Burden of Disease 2013 Study. *JAMA pediatrics*. 2016;170(3):267-87.
13. van Esso D, del Torso S, Hadjipanayis A, Biver A, Jaeger-Roman E, Wettergren B, et al. Paediatric primary care in Europe: variation between countries. *Archives of disease in childhood*. 2010;95(10):791-5.
14. Woodhead M. China to train 22,000 more paediatricians in next four years. *BMJ (Clinical research ed)*. 2016;352:i1376.
15. Ehrich JH, Tenore A, del Torso S, Pettoello-Mantovani M, Lenton S, Grossman Z. Diversity of Pediatric Workforce and Education in 2012 in Europe: A Need for Unifying Concepts or Accepting Enjoyable Differences? *The Journal of pediatrics*. 2015;167(2):471-6.e4.
16. Harris PA, Taylor R, Thielke R, Payne J, Gonzalez N, Conde JG. Research electronic data capture (REDCap)--a metadata-driven methodology and workflow process for providing translational research informatics support. *Journal of biomedical informatics*. 2009;42(2):377-81.
17. Global Pediatric Education Consortium. [Available from: <http://www.globalpediatrics.org/>.
18. UNICEF. Country Statistics. [https://www.unicef.org/statistics/index\\_countrystats.html](https://www.unicef.org/statistics/index_countrystats.html). 2015.
19. WHO. Global strategy on human resources for health: workforce 2030. 2016.
20. Ranson MK, Chopra M, Atkins S, Dal Poz MR, Bennett S. Priorities for research into human resources for health in low- and middle-income countries. *Bulletin of the World Health Organization*. 2010;88(6):435-43.
21. McColgan M, Winch R, Clark SJ, Ewing C, Modi N, Greenough A. The changing UK paediatric consultant workforce: report from the Royal College of Paediatrics and Child Health. *Archives of disease in childhood*. 2017;102(2):170-3.

22. Freed GL, Moran LM, Van KD, Leslie LK. Current Workforce of General Pediatricians in the United States. *Pediatrics*. 2016;137(4).
23. Mullan F, Frehywot S. Non-physician clinicians in 47 sub-Saharan African countries. *Lancet* (London, England). 2007;370(9605):2158-63.
24. Hu KJ, Sun ZZ, Rui YJ, Mi JY, Ren MX. Shortage of paediatricians in China. *Lancet* (London, England). 2014;383(9921):954.
25. Leu HI, Chang WT, Lin MH, Chen TJ, Hwang SJ, Chou LF, et al. Urban-Rural Disparity in Geographical and Temporal Availability of Pediatric Clinics: A Nationwide Survey in Taiwan. *Pediatrics and neonatology*. 2016.
26. Bundred P, Gibbs T. Medical migration and Africa: an unwanted legacy of educational change. *Medical teacher*. 2007;29(9):893-6.
27. Shipman SA, Lan J, Chang CH, Goodman DC. Geographic maldistribution of primary care for children. *Pediatrics*. 2011;127(1):19-27.
28. Pediatrician workforce statement. *Pediatrics*. 2005;116(1):263-9.
29. RCPCH. RCPCH Medical Workforce Census 2013. 2014.
30. Huish R. Going where no doctor has gone before: the role of Cuba's Latin American School of Medicine in meeting the needs of some of the world's most vulnerable populations. *Public health*. 2008;122(6):552-7.
31. Ganapathi L, Martins Y, Schumann D, Russ C. Overcoming challenges to develop pediatric postgraduate training programs in low- and middle-income countries. *Education for health* (Abingdon, England). 2014;27(3):277-82.
32. Aluttis C, Bishaw T, Frank MW. The workforce for health in a globalized context--global shortages and international migration. *Global health action*. 2014;7:23611.
33. Taylor AL, Hwenda L, Larsen BI, Daulaire N. Stemming the brain drain--a WHO global code of practice on international recruitment of health personnel. *The New England journal of medicine*. 2011;365(25):2348-51.
34. Dayrit M, Taylor A, Yan J, Braichet JM, Zurn P, Taylor A, et al. WHO code of practice on the international recruitment of health personnel. *Bulletin of the World Health Organization*. 2008;86(10):739.
35. Penazzato M, Davies MA, Apollo T, Negussie E, Ford N. Task shifting for the delivery of pediatric antiretroviral treatment: a systematic review. *Journal of acquired immune deficiency syndromes (1999)*. 2014;65(4):414-22.
36. Sanne I, Orrell C, Fox MP, Conradie F, Ive P, Zeinecker J, et al. Nurse versus doctor management of HIV-infected patients receiving antiretroviral therapy (CIPRA-SA): a randomised non-inferiority trial. *Lancet* (London, England). 2010;376(9734):33-40.
37. Lynch S, Ford N, van Cutsem G, Bygrave H, Janssens B, Decroo T, et al. Public health. Getting HIV treatment to the most people. *Science* (New York, NY). 2012;337(6092):298-300.
38. WHO. Treat, Train, Retain. The AIDS and health workforce plan. 2006.
39. Fulton BD, Scheffler RM, Sparkes SP, Auh EY, Vujicic M, Soucat A. Health workforce skill mix and task shifting in low income countries: a review of recent evidence. *Hum Resour Health*. 2011;9:1.
40. Kanyuka M, Ndawala J, Mleme T, Chisesa L, Makwemba M, Amouzou A, et al. Malawi and Millennium Development Goal 4: a Countdown to 2015 country case study. *The Lancet Global health*. 2016;4(3):e201-14.
41. Mullan F, Frehywot S, Omaswa F, Buch E, Chen C, Greysen SR, et al. Medical schools in sub-Saharan Africa. *Lancet* (London, England). 2011;377(9771):1113-21.
42. Haley CA, Vermund SH, Moyo P, Kipp AM, Madzima B, Kanyowa T, et al. Impact of a critical health workforce shortage on child health in Zimbabwe: a country case study on progress in child survival, 2000-2013. *Health policy and planning*. 2017.

1  
2  
3  
4  
5  
6  
7  
8  
9  
10  
11  
12  
13  
14  
15  
16  
17  
18  
19  
20  
21  
22  
23  
24  
25  
26  
27  
28  
29  
30  
31  
32  
33  
34  
35  
36  
37  
38  
39  
40  
41  
42  
43  
44  
45  
46  
47  
48  
49  
50  
51  
52  
53  
54  
55  
56  
57  
58  
59  
60

Confidential: For Review Only

**Table 1: Characteristics of responder, non-responder, and no contact identified groups**

|                                                                        | Responder             | Non-responder        | No contact identified | <i>P</i> value |
|------------------------------------------------------------------------|-----------------------|----------------------|-----------------------|----------------|
| Countries, no. (%)                                                     | 121 (61)              | 45 (23)              | 32 (16)               |                |
| GDP classification <sup>1</sup>                                        |                       |                      |                       | 0.18*          |
| Low income, no. (%)                                                    | 14 (12)               | 12 (27)              | 5 (16)                |                |
| Lower middle income, no. (%)                                           | 30 (25)               | 12 (27)              | 8 (25)                |                |
| Upper middle income, no. (%)                                           | 34 (28)               | 12 (27)              | 12 (38)               |                |
| High income, no. (%)                                                   | 43 (36)               | 9 (20)               | 7 (22)                |                |
| Region <sup>2</sup>                                                    |                       |                      |                       | 0.002*         |
| Africa, no. (%)                                                        | 23 (19)               | 17 (38)              | 7 (21)                |                |
| South-East Asia, no. (%)                                               | 8 (7)                 | 1 (2)                | 1 (3)                 |                |
| South and Central America, no. (%)                                     | 19 (16)               | 8 (18)               | 5 (16)                |                |
| Western Pacific, no. (%)                                               | 12 (10)               | 4 (9)                | 13 (41)               |                |
| Eastern Mediterranean, no. (%)                                         | 15 (12)               | 6 (13)               | 0                     |                |
| North America, no. (%)                                                 | 3 (2)                 | 1 (2)                | 0                     |                |
| Europe, no. (%)                                                        | 41 (34)               | 8 (18)               | 6 (19)                |                |
| Country population, <sup>3</sup> median in thousands (IQR)             | 10,824 (4,503-43,417) | 7,237 (2,175-17,468) | 274 (98-1,208)        | <0.001**       |
| Country population <18 years, <sup>4</sup> median in thousands (IQR)   | 3,744 (1,081-14,144)  | 3,248 (798-9,500)    | 113 (27-581)          | 0.08**         |
| Number of physicians per 100,000 population, <sup>6</sup> median (IQR) | 158 (43-290)          | 62 (8-241)           | 46 (19-147)           | 0.002**        |

<sup>1</sup> World Bank list of economies (2017) [Internet]. World Bank. Available from: <http://databank.worldbank.org/data/download/site-content/CLASS.xls>

<sup>2</sup> Region classification based on "WHO regional offices." World Health Organization, World Health Organization, 2017, [www.who.int/about/regions/en/](http://www.who.int/about/regions/en/).

<sup>3</sup> Population, total. (2017, September 18). Retrieved October 09, 2017, from <https://data.worldbank.org/indicator/SP.POP.TOTL>

<sup>4</sup> The State of the World's Children 2016 Statistical Tables. (2016, June 27). Retrieved October 31, 2017, from <https://data.unicef.org/resources/state-worlds-children-2016-statistical-tables/>

<sup>6</sup> The 2016 update, Global Health Workforce Statistics, World Health Organization, Geneva (<http://www.who.int/hrh/statistics/hwfstats/>).

\* *P* values were calculated using Fisher's exact tests for categorical variables

\*\* *P* values were calculated using Kruskal-Wallis tests for continuous variables (based on chi-square statistics with 2 degrees of freedom.)

**Table 2: Results by GDP Classification**

|                                                                                                                                    | <b>World<br/>(N=121)</b> | <b>Low Income<br/>(N=14)</b> | <b>Lower Middle<br/>Income (N=30)</b> | <b>Upper Middle<br/>Income (N=34)</b> | <b>High Income<br/>(N=43)</b> | <b>P value</b> |
|------------------------------------------------------------------------------------------------------------------------------------|--------------------------|------------------------------|---------------------------------------|---------------------------------------|-------------------------------|----------------|
| Number of pediatricians per country, median (IQR)                                                                                  | 650 (180-3,500)          | 70 (25-200)                  | 600 (250-5,000)                       | 1,700 (256-6,000)                     | 1,400 (500-3,500)             | <0.001**       |
| Number of pediatricians per 100,000 children <18 years <sup>1</sup> , median (IQR)                                                 | 32 (5-74)                | 0.5 (0.3-1.4)                | 6 (3-32)                              | 30 (15-60)                            | 72 (44-118)                   | <0.001**       |
| Number of new pediatricians entering the workforce each year per 100,000 children <18 years in country <sup>1</sup> , median (IQR) | 1.44 (0.42-3.07)         | 0.08 (0.03-0.18)             | 0.45 (0.02-0.93)                      | 1.36 (0.57-2.09)                      | 3.10 (2.05-4.06)              | 0.01**         |
| Number of countries reporting transition from pediatric care <sup>†</sup>                                                          |                          |                              |                                       |                                       |                               |                |
| by age 12 years, no. (%)                                                                                                           | 3 (3)                    | 0                            | 3 (10)                                | 0                                     | 0                             | 0.13*          |
| by age 15 years, no. (%)                                                                                                           | 47 (39)                  | 9 (64)                       | 15 (50)                               | 13 (39)                               | 10 (23)                       | 0.002*         |
| by age 18 years, no. (%)                                                                                                           | 98 (82)                  | 14 (100)                     | 27 (90)                               | 26 (79)                               | 31 (72)                       | 0.01*          |
| by age 21 years, no. (%)                                                                                                           | 118 (98)                 | 14 (100)                     | 30 (100)                              | 33 (100)                              | 41 (95)                       | 0.18*          |
| Countries reporting regular pediatric promotive and preventive care received, no. (%)                                              | 110 (91)                 | 9 (64)                       | 26 (87)                               | 33 (97)                               | 42 (98)                       | <0.001*        |
| Percentage of primary care provided by non-physician, median (IQR)                                                                 | 28 (9-58)                | 82 (70-85)                   | 34 (11-61)                            | 28.5 (2-51)                           | 24 (9-45)                     | 0.01**         |
| Percentage of primary care provided by general physician, family doctor, or medical officer, median (IQR)                          | 21 (11-36)               | 12 (7-16)                    | 24 (14-42)                            | 18 (10-27)                            | 23 (10-36)                    | 0.76**         |
| Percentage of primary care provided by pediatrician, median (IQR)                                                                  | 33 (13-57)               | 17 (8-22)                    | 30 (12-49)                            | 44 (23-56)                            | 46 (7-73)                     | 0.04**         |
| Number of physicians per 100,000 population, <sup>2</sup> median (IQR)                                                             | 158.1 (43.4-290.0)       | 6.6 (3.0-12.0)               | 76.6 (20.1-154.6)                     | 158.1 (85.4-246.3)                    | 299 (196.4-379.1)             | <0.001**       |

<sup>1</sup> The State of the World's Children 2016 Statistical Tables. (2016, June 27). Retrieved October 31, 2017, from <https://data.unicef.org/resources/state-worlds-children-2016-statistical-tables/>

<sup>2</sup> The 2016 update, Global Health Workforce Statistics, World Health Organization, Geneva (<http://www.who.int/hrh/statistics/hwfstats/>).

\*P values were calculated using Cuzick's nonparametric tests for trend for continuous variables (based on Z statistics with 1 degree of freedom).

\*\*P values were calculated using Cochran-Armitage trend tests for categorical variables (based on chi-square statistics with 1 degree of freedom).

† Age of transition from pediatric care not reported by one country in the upper middle income group.

**Table 3: Results by Region**

|                                                                                                                                   | World (N=121)      | Africa (N=23)    | South-East Asia (N=8) | South and Central America (N=19) | Western Pacific (N=12) | Eastern Mediterranean (N=15) | North America (N=3)   | Europe (N=41)       | P value  |
|-----------------------------------------------------------------------------------------------------------------------------------|--------------------|------------------|-----------------------|----------------------------------|------------------------|------------------------------|-----------------------|---------------------|----------|
| GDP classification <sup>1</sup>                                                                                                   |                    |                  |                       |                                  |                        |                              |                       |                     |          |
| Low income, no. (%)                                                                                                               | 14 (12)            | 11 (48)          | 1 (13)                | 1 (5)                            | 0                      | 1 (7)                        | 0                     | 0                   | <0.001*  |
| Lower middle income, no. (%)                                                                                                      | 30 (25)            | 6 (26)           | 6 (75)                | 4 (21)                           | 5 (42)                 | 5 (33)                       | 0                     | 4 (10)              |          |
| Upper middle income, no. (%)                                                                                                      | 34 (28)            | 5 (22)           | 1 (13)                | 12 (63)                          | 1 (8)                  | 4 (27)                       | 1 (33)                | 10 (24)             |          |
| High income, no. (%)                                                                                                              | 43 (36)            | 1 (4)            | 0                     | 2 (11)                           | 6 (50)                 | 5 (33)                       | 2 (67)                | 27 (66)             |          |
| Number of pediatricians per country, median (IQR)                                                                                 | 650 (180-3,500)    | 70 (23-167)      | 500 (320-3,700)       | 1,200 (30-5,500)                 | 2,900 (600-5,600)      | 650 (425-3000)               | 25,000 (2,667-80,000) | 1,545 (500-4,500)   | <0.001** |
| Number of pediatricians per 100,000 children <18 years, <sup>2</sup> median (IQR)                                                 | 32 (5-74)          | 0.8 (0.4-2.6)    | 4 (3-9)               | 47 (9-64)                        | 32 (17-64)             | 25 (5-49)                    | 59 (38-109)           | 87 (49-135)         | <0.001** |
| Number of new pediatricians entering the workforce each year per 100,000 children <18 years in country, <sup>2</sup> median (IQR) | 1.44 (0.42-3.07)   | 0.08 (0.04-0.14) | 0.42 (0.35-0.79)      | 1.47 (1.05-2.67)                 | 1.44 (0.60-3.06)       | 0.80 (0.37-2.19)             | 5.61 (1.66-9.57)      | 3.08 (1.86-4.05)    | <0.001** |
| Transition from pediatric care†                                                                                                   |                    |                  |                       |                                  |                        |                              |                       |                     |          |
| by age 12 years, no. (%)                                                                                                          | 3 (3)              | 1 (4)            | 0                     | 2 (11)                           | 0                      | 0                            | 0                     | 0                   | 0.25*    |
| by age 15 years, no. (%)                                                                                                          | 47 (39)            | 16 (70)          | 6 (75)                | 8 (44)                           | 1 (8)                  | 11 (73)                      | 0                     | 5 (12)              | <0.001*  |
| by age 18 years, no. (%)                                                                                                          | 98 (82)            | 23 (100)         | 7 (88)                | 15 (83)                          | 8 (67)                 | 15 (100)                     | 2 (67)                | 29 (71)             | <0.001*  |
| by age 21 years, no. (%)                                                                                                          | 118 (98)           | 23 (100)         | 8 (100)               | 18 (100)                         | 11 (92)                | 15 (100)                     | 2 (67)                | 41 (100)            | 0.01*    |
| Countries reporting regular pediatric promotive and preventive care received, no. (%)                                             | 110 (91)           | 19 (83)          | 7 (88)                | 19 (100)                         | 11 (92)                | 10 (67)                      | 3 (100)               | 41 (100)            | 0.002*   |
| Percentage of primary care provided by non-physician, median (IQR)                                                                | 28 (9-58)          | 81 (53-85)       | 50 (35-68)            | 32 (17-61)                       | 11 (5-27)              | 9 (17-26)                    | 30 (12-32)            | 13 (3-33)           | <0.001** |
| Percentage of primary care provided by general physician, family doctor, or medical officer, median (IQR)                         | 20 (11-36)         | 17 (12-25)       | 17 (11-38)            | 18 (12-28)                       | 36 (15-46)             | 21 (14-24)                   | 17 (17-17)            | 22 (9-49)           | 0.83**   |
| Percentage of primary care provided by pediatrician, median (IQR)                                                                 | 33 (13-59)         | 3 (2-16)         | 27 (20-33)            | 26 (23-55)                       | 50 (46-71)             | 59 (47-69)                   | 51 (51-51)            | 48 (26-71)          | <0.001** |
| Number of physicians per 100,000 population, <sup>3</sup> (median, IQR)                                                           | 158.1 (43.4-290.0) | 12.0 (5.5-37.2)  | 39.2 (23.6-64.7)      | 117.9 (81.7-116.5)               | 175 (114.5-257.5)      | 154.6 (85.4-196.4)           | 247.7 (207.1-255.4)   | 331.1 (277.7-403.5) | <0.001** |

<sup>1</sup> World Bank list of economies (2017) [Internet]. World Bank. Available from: <http://databank.worldbank.org/data/download/site-content/CLASS.xls>

<sup>2</sup> The State of the World's Children 2016 Statistical Tables. (2016, June 27). Retrieved October 31, 2017, from <https://data.unicef.org/resources/state-worlds-children-2016-statistical-tables/>

<sup>3</sup> The 2016 update, Global Health Workforce Statistics, World Health Organization, Geneva (<http://www.who.int/hrh/statistics/hwfstats/>).

\* *P* values were calculated using Fisher's exact tests for categorical variables

\*\**P* values were calculated using Kruskal-Wallis tests for continuous variables (based on chi-square statistics with 6 degrees of freedom).

1 † Age of transition from pediatric care not reported by one country in the South and Central America region.

2  
3  
4  
5  
6  
7  
8  
9  
10  
11  
12  
13  
14  
15  
16  
17  
18  
19  
20  
21  
22  
23  
24  
25  
26  
27  
28  
29  
30  
31  
32  
33  
34  
35  
36  
37  
38  
39  
40  
41  
42  
43  
44  
45  
46  
47

Confidential: For Review Only

1  
2  
3  
4  
5  
6  
7  
8  
9  
10  
11  
12  
13  
14  
15  
16  
17  
18  
19  
20  
21  
22  
23  
24  
25  
26  
27  
28  
29  
30  
31  
32  
33  
34  
35  
36  
37  
38  
39  
40  
41  
42  
43  
44  
45  
46  
47  
48  
49  
50  
51  
52  
53  
54  
55  
56  
57  
58  
59  
60

**Figure 1: Pediatrician density per 100,000 children <18 years old\***



\*Data Source: UNICEF Country Statistics

254x190mm (300 x 300 DPI)



1  
2  
3  
4  
5  
6  
7  
8  
9  
10  
11  
12  
13  
14  
15  
16  
17  
18  
19  
20  
21  
22  
23  
24  
25  
26  
27  
28  
29  
30  
31  
32  
33  
34  
35  
36  
37  
38  
39  
40  
41  
42  
43  
44  
45  
46  
47  
48  
49  
50  
51  
52  
53  
54  
55  
56  
57  
58  
59  
60

**Figure 2: Type of provider seen for Primary Care**



254x190mm (300 x 300 DPI)

# International Pediatrics Survey

Please complete the survey below.

Thank you!

This survey is designed to learn more about how many pediatricians are practicing, who provides medical care for children, and how pediatricians are trained in your country.

Some of the questions ask for specific numbers and may be difficult for you to answer. Please answer to the best of your knowledge. If there is someone who would be better able to answer a question in your country, please tell us their contact information by emailing [beth.harper@childrens.harvard.edu](mailto:beth.harper@childrens.harvard.edu) or in the comment box at the end of the survey. Thankyou!

What language do you prefer for this survey?

English

Country Name

---

Your email address

---

**General Practice Information**

In [country], is there specific clinical care for children, separate from care for adults?  Yes  No

At approximately what age do children in [country] transition out of specific pediatric care to adult care?  < 10 years  10-12 years  13-15 years  16-18 years  19-21 years  >21 years (Years)

Do children in [country] receive regular preventative and promotive care throughout childhood (well-child checks, growth monitoring, nutrition assessment, parenting advice, anticipatory guidance, immunization) by either a physician or non-physician health care provider?  Yes  No

If a child is receiving regular preventative and promotive care in [country], what type of provider will he or she see?   
Non-physician provider 100% of the time      Non-physician provider and Physician equally      Physician 100% of the time   
[Scale bar]   
(Place a mark on the scale above)

If a child is seeing a PHYSICIAN for regular preventative or promotive care in [country], what type of physician will he or she most often see?   
General physician, Family physician, or Medical officer 100% of the time      General physician, Family physician, Medical officer OR Pediatrician equally      Pediatrician 100% of the time   
[Scale bar]   
(Place a mark on the scale above)

1  
2  
3  
4  
5  
6  
7  
8  
9  
10  
11  
12  
13  
14  
15  
16  
17  
18  
19  
20  
21  
22  
23  
24  
25  
26  
27  
28  
29  
30  
31  
32  
33  
34  
35  
36  
37  
38  
39  
40  
41  
42  
43  
44  
45  
46  
47  
48  
49  
50  
51  
52  
53  
54  
55  
56  
57  
58  
59  
60

---

---

**In [country], if you visited the following types of institutions, how likely is it that a Pediatrician would be working there?**

|                                   |                       |                       |                       |                       |
|-----------------------------------|-----------------------|-----------------------|-----------------------|-----------------------|
| General or primary care clinic    | <input type="radio"/> | <input type="radio"/> | <input type="radio"/> | <input type="radio"/> |
| Public or Government-run hospital | <input type="radio"/> | <input type="radio"/> | <input type="radio"/> | <input type="radio"/> |
| Faith-Based hospital              | <input type="radio"/> | <input type="radio"/> | <input type="radio"/> | <input type="radio"/> |
| Private hospital                  | <input type="radio"/> | <input type="radio"/> | <input type="radio"/> | <input type="radio"/> |
| Academic/referral center          | <input type="radio"/> | <input type="radio"/> | <input type="radio"/> | <input type="radio"/> |

Confidential: For Review Only

1 **Pediatrics Workforce**

2  
3  
4 Approximately how many pediatricians (including  
5 pediatricians and pediatric sub-specialists) are  
6 currently working in [country]?

(If unable to estimate, please leave blank. Please  
estimate number of persons, even if part-time.)

7  
8  
9 Please check all of the types of pediatric  
10 subspecialty care that are currently available in  
11 [country].

- Adolescent Medicine
- Pediatric Allergist
- Pediatric Anesthesiologist
- Pediatric Cardiologist
- Child Development/Developmental Medicine
- Pediatric Dermatologist
- Pediatric Ear, Nose, and Throat surgeon
- Pediatric Endocrinologist
- Pediatric Gastroenterologist
- Geneticist
- Pediatric Hematologist Pediatric
- Immunologist Pediatric
- Infectious Disease Pediatric
- Intensivist (PICU) Metabolic
- Disease Specialist Pediatric
- Nephrologist / Renal
- Neonatologist (NICU) Pediatric
- Neurologist Pediatric Oncologist
- Pediatric Ophthalmologist
- Pediatric Orthopedist
- Pediatric Pulmonologist
- Pediatric Psychiatrist
- Pediatric Rheumatologist
- Pediatric Surgeon Pediatric
- Urologist
- (Please select all that apply)

1 **What percentage of pediatricians working in [country] work in the following areas?**

2

3

|                                         | None                  | < 5%                  | 5-25%                 | 25-50%                | 50-75%                | 75-95%                | >95%                  | 100%                  |
|-----------------------------------------|-----------------------|-----------------------|-----------------------|-----------------------|-----------------------|-----------------------|-----------------------|-----------------------|
| 4 Public Sector only                    | <input type="radio"/> |
| 6 Private Sector only                   | <input type="radio"/> |
| 8 Both in the Public and Private Sector | <input type="radio"/> |

9

10

11

12 Approximately how many NEW pediatricians are entering  
13 the workforce in [country] each year?

(If unable to estimate, please leave blank)

14 Based upon the number of NEW and RETIRING  
15 pediatricians each year in [country], what are  
16 workforce expectations over the next 10 years?

- 17  Increase  
18  Decrease  
19  Stable
- 20
- 21
- 22
- 23
- 24
- 25
- 26
- 27
- 28
- 29
- 30
- 31
- 32
- 33
- 34
- 35
- 36
- 37
- 38
- 39
- 40
- 41
- 42
- 43
- 44
- 45
- 46
- 47
- 48
- 49
- 50
- 51
- 52
- 53
- 54
- 55
- 56
- 57
- 58
- 59
- 60

## Education and Training in Pediatrics

1  
2 Are there post-graduate training programs in  Yes  
3 Pediatrics in [country]?  No  
4

5  
6 How many post-graduate training programs in \_\_\_\_\_  
7 pediatrics are there in [country]?  
8

9  
10 Is there a published directory or list of these  Yes  
11 programs?  No

12  
13 Is this directory or list available on the internet?  Yes No  
14

15 Please list the website or provide a link: \_\_\_\_\_  
16

17  
18 Is there someone we may contact to obtain the  Yes  
19 directory or list?  No  
20

21  
22 Please include the name and contact information  
23 below: \_\_\_\_\_  
24  
25

26 Please list as many of the programs as possible,  
27 along with contact information if available. \_\_\_\_\_  
28  
29

30  
31 Is there a national or regional accreditation  Yes  
32 organization that accredits programs in [country]?  No  
33

34 What is the name of the accrediting organization or \_\_\_\_\_  
35 organizations?  
36

37  
38 Are any of the programs in [country] accredited?  Yes - all Yes -  
39  some No  
40

41  
42 The following questions aim to understand how many years of training it takes to become a pediatrician in [country].  
43

44 Is a university degree required prior to beginning  Yes  
45 medical school?  No  
46  
47  
48  
49  
50  
51  
52  
53  
54  
55  
56  
57  
58  
59  
60

1  
2  
3 How many years of medical school, at a minimum, are  
4 required? \_\_\_\_\_  
5  
6

7 How many years of general medicine training or  
8 internship that is not specific to pediatrics? \_\_\_\_\_  
9

10 How many years of post-graduate training specific to  
11 pediatrics? \_\_\_\_\_  
12

13 Is additional supervised time in practice required to  
14 register as a specialist?  Yes  
15  No  
16

17 How many years of additional supervised practice is  
18 required to register as a specialist? \_\_\_\_\_  
19  
20

21 In [country], are there national standardized  
22 guidelines/requirements for postgraduate pediatric  
23 training?  Yes  
24  No

25 Is there a standardized curriculum (i.e., national  
26 curriculum) in place for pediatric post-graduate  
27 training programs?  Yes  
28  No

29 What body is in charge of the standardized (i.e.  
30 national) curriculum? \_\_\_\_\_  
31

32 Is there a published resource of post-graduate  
33 training program requirements?  Yes  
34  No

35 Please include a link to the website for this  
36 resource or contact information  
37 \_\_\_\_\_  
38  
39

40 Are there pediatric sub-specialty training  
41 opportunities in your country?  Yes  
42  No

(We define sub-specialty training as training  
43 within a particular field of pediatrics, for  
44 example pediatric endocrinology or pediatric  
45 cardiology)  
46  
47  
48  
49  
50  
51  
52  
53  
54  
55  
56  
57  
58  
59  
60



1  
2  
3  
4  
5  
6  
7  
8  
9  
10  
11  
12  
13  
14  
15  
16  
17  
18  
19  
20  
21  
22  
23  
24  
25  
26  
27  
28  
29  
30  
31  
32  
33  
34  
35  
36  
37  
38  
39  
40  
41  
42  
43  
44  
45  
46  
47  
48  
49  
50  
51  
52  
53  
54  
55  
56  
57  
58  
59  
60

Please check all of the pediatric sub-specialties for which there are training programs in [country].

- Adolescent Medicine
  - Pediatric Allergist Pediatric
  - Anesthesiologist Pediatric
  - Cardiologist
  - Child Development/Developmental Medicine
  - Pediatric Dermatologist
  - Pediatric Ear, Nose, and Throat surgeon
  - Pediatric Endocrinologist
  - Pediatric Gastroenterologist
  - Geneticist
  - Pediatric Hematologist Pediatric
  - Immunologist Pediatric
  - Infectious Disease Pediatric
  - Intensivist (PICU) Metabolic
  - Disease Specialist Pediatric
  - Nephrologist / Renal
  - Neonatologist (NICU) Pediatric
  - Neurologist Pediatric Oncologist
  - Pediatric Ophthalmologist
  - Pediatric Orthopedist
  - Pediatric Pulmonologist
  - Pediatric Psychiatrist
  - Pediatric Rheumatologist
  - Pediatric Surgeon Pediatric
  - Urologist
- (Select all that apply)

Confidential: For Review Only

1  
2  
3  
4  
5  
6  
7  
8  
9  
10  
11  
12  
13  
14  
15  
16  
17  
18  
19  
20  
21  
22  
23  
24  
25  
26  
27  
28  
29  
30  
31  
32  
33  
34  
35  
36  
37  
38  
39  
40  
41  
42  
43  
44  
45  
46  
47  
48  
49  
50  
51  
52  
53  
54  
55  
56  
57  
58  
59  
60

---

We greatly appreciate any additional information, clarifications, or comments you may have! Please tell us about them here.

---

THANK YOU for your participation! You will receive a copy of the report when available. If you have additional questions or concerns, please enter them below or email us at [beth.harper@childrens.harvard.edu](mailto:beth.harper@childrens.harvard.edu)

Confidential: For Review Only

### Supplemental File - List of Country Respondents by Region<sup>1</sup>

| <i>Africa</i>    |                      |                              |
|------------------|----------------------|------------------------------|
| <i>Responder</i> | <i>Non-responder</i> | <i>No Contact Identified</i> |
| Algeria          | Benin                | Cabo Verde                   |
| Angola           | Burkina Faso         | Central African Republic     |
| Botswana         | Burundi              | Comoros                      |
| Congo, Dem. Rep. | Cameroon             | Equatorial Guinea            |
| Côte d'Ivoire    | Chad                 | Guinea                       |
| Ethiopia         | Congo, Rep.          | São Tomé and Príncipe        |
| Gambia, The      | Eritrea              | South Sudan                  |
| Ghana            | Gabon                |                              |
| Kenya            | Guinea-Bissau        |                              |
| Liberia          | Lesotho              |                              |
| Malawi           | Madagascar           |                              |
| Mozambique       | Mali                 |                              |
| Namibia          | Mauritania           |                              |
| Nigeria          | Mauritius            |                              |
| Rwanda           | Niger                |                              |
| Seychelles       | Senegal              |                              |
| South Africa     | Sierra Leone         |                              |
| Swaziland        |                      |                              |
| Tanzania         |                      |                              |
| Togo             |                      |                              |
| Uganda           |                      |                              |
| Zambia           |                      |                              |
| Zimbabwe         |                      |                              |

<sup>1</sup> Regions defined using World Health Organization regional groupings with North America separated from Central and South America. Further information about WHO regional groupings can be found at: [https://www.who.int/healthinfo/global\\_burden\\_disease/definition\\_regions/en/](https://www.who.int/healthinfo/global_burden_disease/definition_regions/en/) (Accessed December 2018).

*Eastern Mediterranean*

| <i>Responder</i>     | <i>Non-responder</i> | <i>No Contact Identified</i> |
|----------------------|----------------------|------------------------------|
| Afghanistan          | Djibouti             |                              |
| Bahrain              | Lebanon              |                              |
| Egypt, Arab Rep.     | Morocco              |                              |
| Iran, Islamic Rep.   | Saudi Arabia         |                              |
| Iraq                 | Somalia              |                              |
| Jordan               | Yemen, Rep.          |                              |
| Kuwait               |                      |                              |
| Libya                |                      |                              |
| Oman                 |                      |                              |
| Pakistan             |                      |                              |
| Qatar                |                      |                              |
| Sudan                |                      |                              |
| Syrian Arab Republic |                      |                              |
| Tunisia              |                      |                              |
| United Arab Emirates |                      |                              |

*Europe*

| <i>Responder</i>       | <i>Non-responder</i> | <i>No Contact Identified</i> |
|------------------------|----------------------|------------------------------|
| Albania                | Croatia              | Andorra                      |
| Armenia                | Cyprus               | Azerbaijan                   |
| Austria                | Kazakhstan           | Kosovo                       |
| Belarus                | Kyrgyz Republic      | Montenegro                   |
| Belgium                | Malta                | San Marino                   |
| Bosnia and Herzegovina | Netherlands          | Turkmenistan                 |
| Bulgaria               | Tajikistan           |                              |
| Czech Republic         | Uzbekistan           |                              |
| Denmark                |                      |                              |
| Estonia                |                      |                              |
| Finland                |                      |                              |
| France                 |                      |                              |
| Georgia                |                      |                              |
| Germany                |                      |                              |
| Greece                 |                      |                              |
| Hungary                |                      |                              |
| Iceland                |                      |                              |
| Ireland                |                      |                              |
| Israel                 |                      |                              |
| Italy                  |                      |                              |
| Latvia                 |                      |                              |
| Liechtenstein          |                      |                              |
| Lithuania              |                      |                              |
| Luxembourg             |                      |                              |
| Macedonia, FYR         |                      |                              |
| Moldova                |                      |                              |
| Norway                 |                      |                              |
| Palestine              |                      |                              |
| Poland                 |                      |                              |
| Portugal               |                      |                              |
| Romania                |                      |                              |
| Russian Federation     |                      |                              |
| Serbia                 |                      |                              |
| Slovak Republic        |                      |                              |
| Slovenia               |                      |                              |
| Spain                  |                      |                              |
| Sweden                 |                      |                              |
| Switzerland            |                      |                              |
| Turkey                 |                      |                              |
| Ukraine                |                      |                              |
| United Kingdom         |                      |                              |

*North America*

| <i>Responder</i> | <i>Non-responder</i> | <i>No Contact Identified</i> |
|------------------|----------------------|------------------------------|
| Canada           | Puerto Rico          |                              |
| Mexico           |                      |                              |
| United States    |                      |                              |

Confidential: For Review Only

1  
2  
3  
4  
5  
6  
7  
8  
9  
10  
11  
12  
13  
14  
15  
16  
17  
18  
19  
20  
21  
22  
23  
24  
25  
26  
27  
28  
29  
30  
31  
32  
33  
34  
35  
36  
37  
38  
39  
40  
41  
42  
43  
44  
45  
46  
47  
48  
49  
50  
51  
52  
53  
54  
55  
56  
57  
58  
59  
60

| <i>South and Central America</i> |                      |                                |
|----------------------------------|----------------------|--------------------------------|
| <i>Responder</i>                 | <i>Non-responder</i> | <i>No Contact Identified</i>   |
| Argentina                        | Bahamas, The         | Antigua and Barbuda            |
| Bolivia                          | Belize               | Barbados                       |
| Brazil                           | Costa Rica           | St. Kitts and Nevis            |
| Chile                            | Cuba                 | St. Lucia                      |
| Colombia                         | Dominica             | St. Vincent and the Grenadines |
| Dominican Republic               | Honduras             |                                |
| Ecuador                          | Jamaica              |                                |
| El Salvador                      | Uruguay              |                                |
| Grenada                          |                      |                                |
| Guatemala                        |                      |                                |
| Guyana                           |                      |                                |
| Haiti                            |                      |                                |
| Nicaragua                        |                      |                                |
| Panama                           |                      |                                |
| Paraguay                         |                      |                                |
| Peru                             |                      |                                |
| Suriname                         |                      |                                |
| Trinidad and Tobago              |                      |                                |
| Venezuela, RB                    |                      |                                |

*South-East Asia*

| <i>Responder</i> | <i>Non-responder</i> | <i>No Contact Identified</i> |
|------------------|----------------------|------------------------------|
| Bangladesh       | Maldives             | Timor-Leste                  |
| Bhutan           |                      |                              |
| India            |                      |                              |
| Indonesia        |                      |                              |
| Myanmar          |                      |                              |
| Nepal            |                      |                              |
| Sri Lanka        |                      |                              |
| Thailand         |                      |                              |



*Western Pacific*

| <i>Responder</i>     | <i>Non-responder</i> | <i>No Contact Identified</i> |
|----------------------|----------------------|------------------------------|
| Australia            | Korea, Rep.          | Brunei Darussalam            |
| Cambodia             | Macao SAR, China     | Fiji                         |
| China                | Malaysia             | Kiribati                     |
| Hong Kong SAR, China | Papua New Guinea     | Korea, Dem. People's Rep.    |
| Japan                |                      | Marshall Islands             |
| Lao PDR              |                      | Micronesia, Fed. Sts.        |
| Mongolia             |                      | Nauru                        |
| New Zealand          |                      | Palau                        |
| Philippines          |                      | Samoa                        |
| Singapore            |                      | Solomon Islands              |
| Taiwan, China        |                      | Tonga                        |
| Vietnam              |                      | Tuvalu                       |
|                      |                      | Vanuatu                      |
